1  
2  
3  
4  
5  
6  
7  
8  
9  
10  
11  
12  
13  
14  
15  
16  
17  
18

**Title:**

Cell cycle oscillators underlying orderly proteolysis of E2F8

**Author list and affiliation:**

Danit Wasserman<sup>1</sup>; Sapir Nachum<sup>1</sup>; Meital Cohen<sup>1</sup>; Taylor P Enrico<sup>2</sup>; Meirav Noach-Hirsh<sup>1</sup>;  
Jasmin Parasol<sup>1</sup>, Sarit Zomer-Polak<sup>1</sup>; Naomi Auerbach<sup>1</sup>; Evelin Sheinberger-Chorni<sup>1</sup>; Hadas  
Nevenzal<sup>1</sup>; Nofar Levi-Dadon<sup>1</sup>; Xianxi Wang<sup>2</sup>; Roxane Lahmi<sup>1</sup>; Efrat Michaely<sup>1</sup>; Doron  
Gerber<sup>1</sup>; Michael J. Emanuele<sup>2</sup>; Amit Tzur<sup>1,3</sup>

<sup>1</sup>Faculty of Life Sciences and Institute of Nanotechnology and Advanced Materials, Bar-Ilan  
University, Ramat-Gan 5290002, Israel.

<sup>2</sup>Lineberger Comprehensive Cancer Center, Department of Pharmacology, The University of  
North Carolina at Chapel Hill, Chapel Hill, NC 27599, United States of America.

<sup>3</sup>Corresponding author: Amit Tzur ([amit.tzur@biu.ac.il](mailto:amit.tzur@biu.ac.il))

**Running Title:** Mechanisms of E2F8 temporal dynamics

19 **Abstract:**

20 E2F8 is a transcriptional repressor that antagonizes the canonical cell cycle  
21 transcription factor E2F1. Despite the importance of this atypical E2F family member in cell  
22 cycle, apoptosis and cancer, we lack a complete description of the mechanisms that control  
23 its dynamics. To address this question, we developed a complementary set of static and  
24 dynamic cell-free systems of human origin, which recapitulate inter-mitotic and G1 phases,  
25 and a full transition from pro-metaphase to G1. This revealed an interlocking molecular  
26 switch controlling E2F8 degradation at mitotic exit, involving dephosphorylation of Cdk1  
27 sites in E2F8 and the activation of APC/C<sup>Cdh1</sup>, but not APC/C<sup>Cdc20</sup>. Further, we revealed a  
28 differential stability of E2F8, accounting for its accumulation in late G1 while APC/C<sup>Cdh1</sup> is  
29 still active and suggesting a key role for APC/C in controlling G1-S transcription. Finally, we  
30 identified SCF-Cyclin F as the ubiquitin ligase controlling E2F8 in G2-phase. Altogether, our  
31 data provide new insights into the regulation of E2F8 throughout the cell cycle, illuminating  
32 an extensive coordination between phosphorylation, ubiquitination and transcription in  
33 promoting orderly cell cycle progression.

34

35

36

37

38

39

40

41

42

## 43 Introduction

44 The E2F family of transcription factors plays a pivotal role in regulating pro- and anti-  
45 proliferative processes, with implications in tissue homeostasis and human disease, most  
46 notably cancer (Chen, Tsai et al., 2009). E2F1, the canonical member of the E2F family, is at  
47 the crossroads of the cell cycle and cell death, triggering the gene program dictating S-phase  
48 and mitotic entry on the one hand, and, on the other hand, apoptosis (Hallstrom & Nevins,  
49 2009, Polager & Ginsberg, 2008, Thurlings & de Bruin, 2016).

50 The activity of E2F1 is balanced by two of its direct targets E2F7 and E2F8, also  
51 known as atypical E2Fs (Christensen, Cloos et al., 2005, de Bruin, Maiti et al., 2003, Di  
52 Stefano, Jensen et al., 2003, Maiti, Li et al., 2005). E2F7 and E2F8 are structurally and  
53 functionally related (Lammens, Li et al., 2009); they cooperate in repressing the  
54 transcription of E2F1 and its downstream target genes by binding consensus E2F motifs  
55 along their promoters. The result is a negative feedback circuit whose dynamics control cell  
56 fate, tissue homeostasis and development by mechanisms that are still not entirely clear (Li,  
57 Ran et al., 2008, Ouseph, Li et al., 2012). Despite being part of the 'repressive' branch of E2F  
58 proteins, E2F7 and E2F8 belong to the pro-proliferative gene network underlying cell  
59 proliferation (Cohen, Vecsler et al., 2013).

60 E2F1, as well as E2F7 and E2F8, are regulated post-translationally via temporal  
61 proteolysis. The anaphase-promoting complex/cyclosome (APC/C) is a multi-subunit cell  
62 cycle ubiquitin ligase and core component of the cell cycle machinery (King, Peters et al.,  
63 1995, Sudakin, Ganoth et al., 1995). The APC/C uses two related co-activators termed Cdc20  
64 and Cdh1, which bind substrates and recruit them to the APC/C for ubiquitination and  
65 subsequent degradation (Kernan, Bonacci et al., 2018). We previously identified both E2F7  
66 and E2F8 as targets of the Cdh1-bound form of APC/C (APC/C<sup>Cdh1</sup>) (Cohen et al., 2013).

67 These findings, together with other supporting studies (Boekhout, Yuan et al., 2016), shifted  
68 the model by which the E2F1-E2F7-E2F8 circuitry communicates with the cell cycle clock to  
69 regulate the transition from the G1-phase of the cell cycle into S-phase. Nevertheless, the  
70 exact inter-dynamics of E2F1-E2F7-E2F8 circuitry throughout G1 and the mechanism by  
71 which they are achieved are not entirely resolved. No less obscure is the interplay between  
72 E2F1 and atypical E2Fs during G2-phase and mitosis. Dissecting these complex signaling  
73 circuits is important for understanding the decision making mechanisms at two critical  
74 points in the life of a proliferating cell – commitment to DNA replication and division.

75 Cell-free systems are known for their capacity to reproduce complex cellular  
76 processes *in vitro* while maintaining a physiologically relevant context, bridging the gap  
77 between *in vivo* and *in vitro*. These systems are optimal for direct and quantitative analysis  
78 of time-specific molecular events, including phosphorylation and ubiquitination,  
79 circumventing caveats associated with long-term *in vivo* manipulations. Cell-free systems  
80 can be either ‘static’, meaning they capture a certain physiological state (*e.g.*, interphase),  
81 or ‘dynamic’, reproducing transitions between phases, including the spatiotemporal  
82 dynamics of proteins, chromatin and complex cellular structures (*e.g.*, mitotic spindle).  
83 Mitotic entry and exit, metaphase-to-anaphase transition and cytokinesis were all  
84 demonstrated in frog egg extracts (Funabiki & Murray, 2000, Murray, Desai et al., 1996,  
85 Murray & Kirschner, 1989, Nguyen, Groen et al., 2014), as well as in other early embryonic  
86 systems (Telley, Gaspar et al., 2012). Mammalian cell-free systems have been gradually  
87 integrated in cell cycle research in the last 20 years. Extracts from synchronous cell  
88 populations provide a biochemically amenable system that contains all of the critical  
89 enzymes necessary to recapitulate and analyze protein degradation, phosphorylation and  
90 other key cell cycle signaling events in a somatic 4-stage cell cycle context lacking in egg



91 extracts (Ayad, Rankin et al., 2005, Nguyen, Gitig et al., 1999, Rape & Kirschner, 2004, Rape,  
92 Reddy et al., 2006).

93 Here, we developed and utilized a panel of 'static' and 'dynamic' human cell-free  
94 systems with which we disentangle the mechanism underlying temporal dynamics of the  
95 E2F8 protein from pro-metaphase to late S-phase. *In vivo* studies addressing the regulation  
96 of E2F8 during G2-phase complete the missing piece of the puzzle.

97

## 98 **Results**

### 99 **Temporal dynamics of E2F8 vs. E2F1 across the cell cycle**

100 An overview of E2F8 and E2F1 protein-levels throughout the cell cycle highlights two  
101 important points in the context of this study. First, in synchronous HeLa S3 cell populations  
102 released from a nocodazole-induced pro-metaphase block, E2F1 accumulates during early-  
103 mid G1 coinciding with the peak of APC/C<sup>Cdh1</sup> activity (**Fig. 1A**). In fact, E2F1 dynamics  
104 appear inversely to that of APC/C<sup>Cdh1</sup> target Kifc1 when analyzed in 30 to 60 min time  
105 resolution (**Fig. 1A and Fig. S1**). The rise of E2F8 commences approximately 2.5-3 h after  
106 E2F1 initially appears. Still, E2F8 accumulates prior to the G1-S transition and well before  
107 the rise of canonical APC/C targets. As early as 7 hours after release from nocodazole,  
108 increasing E2F8 levels are evident, yet cells have not yet entered S-phase based on DNA  
109 quantification (**Fig. 1A**). We and others previously showed that APC/C<sup>Cdh1</sup> prevents E2F8  
110 from accumulating in lock-step with E2F1 during mid G1 (Boekhout et al., 2016, Cohen et al.,  
111 2013). Thus, it is unclear how E2F8 levels increase in late G1 while APC/C<sup>Cdh1</sup> is still active.  
112 Secondly, E2F8 levels decrease prior to mitosis through an entirely unknown mechanism  
113 (**Fig. 1A and B**). Even under a tight positive regulation by E2F1, it is unlikely that this  
114 reduction of E2F8 is controlled only at the transcriptional level. Interestingly, while E2F1 is

115 undetectable in pro-metaphase, E2F8 levels are low but still higher than in early-mid G1-  
116 phase (**Fig. 1A**).

117

118 ***Temporal proteolysis of E2F8 in ‘dynamic’ mitotic extracts progressing from pro-***  
119 ***metaphase to G1-phase***

120 The activation of APC/C<sup>Cdc20</sup> following removal of the mitotic checkpoint complex  
121 (MCC) and then of APC/C<sup>Cdh1</sup> (illustrated in **Figure 2A**) are major milestones along mitotic  
122 progression and exit that can be monitored by the sequential onset of Securin and Tome-1  
123 degradation at the metaphase-to-anaphase transition and G1 entry, respectively (Ayad,  
124 Rankin et al., 2003, Hagting, Den Elzen et al., 2002, Zou, McGarry et al., 1999, Zur &  
125 Brandeis, 2001). Mitotic exit is also characterized by a massive dephosphorylation wave  
126 orchestrated by the inactivation of Cdk1 and activation of phosphatases during mitotic exit  
127 (Grallert, Boke et al., 2015, Powers & Hall, 2017, Wurzenberger & Gerlich, 2011).

128 Pro-metaphase extracts can be made from nocodazole-arrested HeLa S3 (S3) cells  
129 (Ayad et al., 2005, Rape & Kirschner, 2004). Here we show that this system could be  
130 dynamically controlled to recreate the biochemistry and signaling of progression from pro-  
131 metaphase to G1-phase. Spindle checkpoint removal occurs spontaneously in pro-  
132 metaphase extracts in a temperature-controlled manner or, more efficiently, by adding the  
133 APC/C E2 enzyme UbcH10. On the flip side, dominant negative UbcH10 (UbcH10<sup>DN</sup>) blocks  
134 the extracts, making it ‘static’ in a pro-metaphase-like state for hours. These features are  
135 manifested by the temporal proteolysis and Cdk1-induced electrophoretic mobility shift of  
136 Securin (Holt, Krutchinsky et al., 2008) (**Fig. 2B**), more specifically, shifting temperature from  
137 25°C to 28°C shortened the half-life of <sup>35</sup>S-labeled Securin in extracts from ~80 to ~60  
138 minutes. The addition of UbcH10 approximately halved Securin half-life under both

139 conditions (**Fig. 2B**). Temporal dynamics of APC/C<sup>Cdh1</sup> substrate Tome-1 was vastly different.  
140 Similar to Securin, increasing temperature facilitated the electrophoretic mobility shift of  
141 Tome-1, known to be associated with mitotic phosphorylation (Ayad et al., 2003, Pe'er,  
142 Lahmi et al., 2013). However, Tome-1 remains stable and at a high electrophoretic mobility  
143 throughout the experiment (**Fig. 2C**). Importantly, addition of Ubch10 triggered orderly  
144 dephosphorylation followed by degradation of Tome-1 in a temperature-controlled manner.  
145 These dynamics were evident by the gradual shift of Tome-1 back to its basal  
146 electrophoretic mobility form and the subsequent reduction of the <sup>35</sup>S signal, recapitulating  
147 the signaling events of mitotic exit, APC/C<sup>Cdh1</sup> activation and G1 entry. Thus, at optimal  
148 reaction conditions, S3 extracts derived from nocodazole arrested pro-metaphase cells can  
149 recapitulate the complete transition from pro-metaphase to G1-like state *in vitro*.

150         Next, we investigated the behavior of E2F8 in this extracts system. E2F8 degradation  
151 was unambiguous only when mitotic exit was accelerated by Ubch10 and commenced  
152 considerably after Securin disappearance. The pattern of E2F8 proteolysis was nearly  
153 identical to that of Tome-1, suggesting that E2F8 degradation is coordinated with APC/C<sup>Cdh1</sup>  
154 activation (**Fig. 2C-E**). Additionally, the electrophoretic mobility display of E2F8 and Tome-1  
155 shared a remarkable resemblance. This observation suggests an unappreciated regulation of  
156 E2F8 by orderly (de)phosphorylation during mitotic progression and exit, as well as  
157 highlights the power of 'dynamic' mitotic extracts in quantifying phosphorylation and  
158 temporal proteolysis of human proteins across cell division landmarks.

#### 159 ***E2F8 degradation by APC/C is Cdh1-specific***

160 Cdc20 vs. Cdh1 specificity of APC/C targets is a key element in the overall mechanism  
161 underlying orderly cell division in all eukaryotes (Kernan et al., 2018). The kinetics of E2F8  
162 degradation observed above (**Fig. 2D**) are consistent with its regulation by APC/C<sup>Cdh1</sup>,

163 despite prior reports suggesting destruction by both APC/C<sup>Cdc20</sup> and APC/C<sup>Cdh1</sup> (Boekhout et  
164 al., 2016). To address this discrepancy, we developed a mitotic cell-free system with a  
165 constitutively active APC/C<sup>Cdc20</sup> and inactive APC/C<sup>Cdh1</sup>. High Cdk1 activity prevents Cdh1  
166 from interacting with APC/C (Jaspersen, Charles et al., 1999, Kramer, Scheuringer et al.,  
167 2000, Listovsky, Zor et al., 2000, Zachariae, Schwab et al., 1998). Thus, we developed an  
168 extract system from mitotic 293-T-REx cells where Cdk1 is constitutively active, due to the  
169 tetracycline (tet)-induced expression of a non-degradable allele of Cyclin B1 (NDB);  
170 hereafter referred to as NDB cells/system (**Fig. 3A**). Non-degradable Cyclin B1 blocks cells in  
171 an anaphase-like state, *i.e.*, post-mitotic checkpoint removal (Pe'er et al., 2013, Wheatley,  
172 Hinchcliffe et al., 1997, Zur & Brandeis, 2001, Zur & Brandeis, 2002). In the absence of tet,  
173 the selected NDB colony tolerates the basal expression of non-degradable Cyclin B1, as  
174 evidenced by the normal cell cycle profile and cell size range (**Fig. 3B and C**). Following  
175 treatment with tet, virtually all cells arrest in mitosis, displaying a typical round shape and  
176 separated sister chromatids (**Fig. 3D-G**). Importantly, APC/C<sup>Cdc20</sup>, but not APC/C<sup>Cdh1</sup>, is active  
177 in tet-treated NDB cells. Consequently, Geminin, an APC/C<sup>Cdc20</sup> substrate (McGarry &  
178 Kirschner, 1998)], but not Cdc20, an APC/C<sup>Cdh1</sup> substrate (Pfleger & Kirschner, 2000), is  
179 reduced in tet-induced NDB cells relative to pro-metaphase arrested mitotic cells (**Fig. 3H**).  
180 A reduction in Cdc20 could be observed only in G1 cells (**Fig. 3I**). Consistent with the  
181 expression of non-degradable Cyclin B1, mitotic extracts derived from tet-induced NDB cells  
182 exhibit high Cdk1 activity, highlighted by the electrophoretic mobility shift of Securin and  
183 Tome-1 (**Fig. 3J**). Moreover, APC/C<sup>Cdc20</sup> is highly active, whereas APC/C<sup>Cdh1</sup> is not, evidenced  
184 by the degradation of Securin but not Tome-1 (**Fig. 3J**). As opposed to 'dynamic' pro-  
185 metaphase extracts made from nocodazole arrested cells (**Fig. 2**), NDB mitotic extracts are  
186 'static' and remain unable to trigger Tome-1 dephosphorylation and degradation by excess

187 of Ubch10 (**Fig. 3K**). Importantly, E2F8 was shifted to a high electrophoretic mobility form  
188 following incubation in NDB mitotic extract, further supporting the idea that E2F8 is  
189 phosphorylated by mitotic kinases. Like Tome-1, E2F8 was not degraded in NDB extracts.  
190 Therefore, experiments in orthogonal cell extract systems, from two different cell lines,  
191 suggest that E2F8 is targeted for degradation by APC/C<sup>Cdh1</sup>, but not APC/C<sup>Cdc20</sup> (**Fig. 3L**).  
192 To rule out the possibility that the stability of E2F8 and Tome-1 in extracts derived from  
193 HEK293 is cell line specific, we inactivated Cdk1 using the small-molecule inhibitor RO-3306.  
194 This treatment successfully overrides the mitotic arrest induced by non-degradable Cyclin  
195 B1, resulting in mitotic exit, evidenced by cell morphology, DNA profiling and the canonical  
196 dephosphorylated state of the APC/C subunit Cdc27 (Kramer et al., 2000) (**Fig. 3M and N**).  
197 Next, we analyzed APC/C complexes by Cdc27 IP in control and RO-3306 treated mitotic  
198 NDB extracts. Cdk1 inhibition causes APC/C to dissociate from Cdc20, bind Cdh1, and  
199 degrade endogenous Cdc20 (an APC/C<sup>Cdh1</sup> substrate), recapitulating the canonical  
200 APC/C<sup>Cdc20</sup>-to-APC/C<sup>Cdh1</sup> switch seen *in vivo* during mitotic exit (**Fig. 3O and P**). Furthermore,  
201 neither Tome-1 nor E2F8 is mobility-shifted in Cdk1-inhibited extracts (**Fig. 3Q**). Most  
202 importantly, E2F8 and Tome-1 were both degraded in RO-3306 treated cell extracts where  
203 APC/C<sup>Cdh1</sup> has been activated. Degradation of both proteins is blocked by dominant negative  
204 Ubch10, and is, thus, APC/C dependent (**Fig. 3Q**). We concluded that E2F8 is specifically  
205 targeted for degradation by APC/C<sup>Cdh1</sup>.

206

### 207 ***E2F8 ubiquitination in G1 is primarily Lys11-linked***

208 Cell extracts generated from synchronous S3 cells 3-3.5 h after release from a nocodazole  
209 block exhibit homogenous and optimal APC/C<sup>Cdh1</sup> activity. These cell extracts, defined here  
210 as 'G1 extracts', have been used for the discovery of E2F8, E2F7, and other cell cycle

211 proteins as APC/C<sup>Cdh1</sup> targets (Cohen et al., 2013, Pe'er et al., 2013, Singh, Winter et al.,  
212 2014). While Lys(K)48-linked ubiquitination is considered the main signal for proteasomal  
213 protein degradation (Kravtsova-Ivantsiv, Sommer et al., 2013), APC/C preference for K11-  
214 linked Ubiquitin chains has been demonstrated for an increasing number of substrates,  
215 including Securin and Kifc1 (Jin, Williamson et al., 2008, Noach-Hirsh, Nevenzal et al., 2015,  
216 Wu, Merbl et al., 2010). To test whether this feature applies to E2F8, we utilized a  
217 designated microfluidic platform with which ubiquitination of freshly expressed proteins can  
218 be tested in G1 extract (Noach-Hirsh et al., 2015). The assay is based on *in situ* detection of  
219 EGFP-tagged substrates (**Fig. S2**) and Rhodamine-labelled Ubiquitin (Rd-Ub) (illustrated in  
220 **Figure 4A and B**). Once ubiquitination of E2F8-EGFP was validated on-chip to be APC/C  
221 specific (**Fig. 4C**), we tested the displacement of Rd-Ub from E2F8 by 10-fold excess of  
222 unlabeled K-to-Arg(R) mutant ubiquitin variants. As expected, excess of unlabeled WT  
223 Ubiquitin in the reaction mix outcompeted Rd-Ub, evidenced by the sharp drop of net Rd  
224 signal. Similar results were obtained when K48R- or K63R-Ubiquitin mutants (UbK48R,  
225 UbK63R) were added. In contrast, the impact of K11R-Ubiquitin mutant (UbK11R) on Rd-Ub  
226 signal was mild (**Fig. 4D**), reflecting the low capacity of this particular mutant to form  
227 ubiquitin chains on E2F8. Comparable degradation assays in G1 extracts were confirmatory:  
228 E2F8 proteolysis became inefficient only when UbK11R was supplemented to the reaction  
229 (**Fig. 4E**), suggesting that E2F8 ubiquitination is primarily mediated by K11-linked ubiquitin  
230 chains.

### 231 ***Multiple functional motifs coordinate E2F8 proteolysis in G1.***

232 Direct assays in G1 extracts have been proven informative in mapping and characterizing  
233 destruction motifs of APC/C substrates (Jin et al., 2008, Pe'er et al., 2013, Singh et al., 2014,  
234 Wu et al., 2010). E2F8 carries multiple motifs potentially associated with APC/C-mediated

235 degradation— three KEN sequences and two RXXL sequences (**Fig. 5A**). We generated point-  
236 mutations in each of these motifs (**Fig. 5B**) and quantified the kinetics of E2F8 proteolysis in  
237 G1 extracts. RXXL-to-GXXV mutation at position 183 inhibited E2F8 degradation (**Fig. 5C**).  
238 Mutations in each of the previously reported KEN boxes at position 5 and 375 (Boekhout et  
239 al., 2016) had a borderline impact on E2F8 proteolysis. However, the two KEN box  
240 mutations had a noticeable impact on E2F8 degradation when combined with mutant RXXL  
241 183 or with each other (**Fig. 5D**). Mutations in RXXL 87 and KEN 637 had no inhibitory effect  
242 (**Fig. 5C and D**). The functionality of KEN 5 and KEN 637 was further assayed in the context  
243 of short N- and C-terminal fragments [(E2F8-N80 and E2F8-C (**Fig. 5E**)], reasoning that this  
244 approach could highlight the potential potency of single elements in driving E2F8  
245 degradation. The E2F8 C-terminus was stable, consistent with this region not regulating  
246 proteolysis. Instead, degradation of E2F8-N80 was efficient and KEN specific (**Fig. 5F**).  
247 Overall, we conclude that RXXL 183, KEN 5, and KEN 375, but not RXXL 85 and KEN 657  
248 mediate E2F8 degradation by APC/C<sup>Cdh1</sup>. This result also highlights the ability of multiple  
249 degrons to contribute cooperatively to substrate proteolysis, perhaps through multivalent  
250 APC/C binding (Watson, Brown et al., 2019).

251

### 252 ***E2F8 proteolysis in G1 is mediated by N-terminal Cdk1 Sites***

253 The temporal electrophoretic mobility of E2F8 in ‘dynamic’ (**Fig. 2**) and ‘static’ (**Fig. 3**)  
254 mitotic extracts can be explained by orderly phosphorylation and dephosphorylation during  
255 mitotic progression and exit. There are four T/SP sites in E2F8-N80 fragment, two of which  
256 are TPxK, *i.e.*, the canonical Cdk1 consensus sites (**Fig. 6A**). Mobility shift of both full-length  
257 E2F8 and N80-E2F8 in NDB mitotic extracts was blocked by Cdk1 inhibitor (**Fig. 6B**). Thr(T)-  
258 to-Ala(A) mutation in position 20 or 44 reduced the mobility shift of E2F8-N80, and all the

259 more so when combined (**Fig. 6C**). We concluded that Cdk1/Cyclin B1 phosphorylates E2F8  
260 in mitosis at position T20 and T44. Phosphorylation in proximity to destruction motifs can  
261 regulate APC/C-mediated ubiquitination (Holt et al., 2008, Singh et al., 2014). This  
262 mechanism helps coordinate degradation with the cell cycle clock (Holt et al., 2008). We,  
263 therefore, tested the potential link between E2F8 phosphorylation and degradation. The  
264 E2F8-N80 fragment (**Fig. 6C**) allowed us to focus on the potential relationship between  
265 T20/T44 phosphorylation and KEN box at position 5. Alanine mutations at T20 and/or T44  
266 had no impact on the degradation of E2F8-N80 in G1 extracts (**Fig. 6D**). In contrast,  
267 phosphomimetic mutation [T-to Asp(D)] at T44 partially impeded E2F8-N80 degradation.  
268 This inhibitory effect was vastly increased when both T20 and T44 were substituted with D  
269 (**Fig. 6D**). Most importantly, T20D/T44D mutation strongly impaired the proteolysis of full-  
270 length E2F8 in G1 extracts (**Fig. 6C**). In fact, the impact of T20D/T44D mutation on E2F8 half-  
271 life in G1 extracts was greater than any of the single KEN or RXXL mutations (**Fig. 5C**).  
272 Altogether, our findings couple E2F8 ubiquitination by APC/C<sup>Cdh1</sup> with an unphosphorylated  
273 state of T20 and T44. This molecular switch can restrict E2F8 degradation by APC/C to times  
274 of low Cdk1 activity.

275

## 276 **Temporal proteolysis of E2F8 across the cell cycle**

277 The contribution of temporal proteolysis to the overall dynamics of E2F8 across the cell  
278 cycle (**Fig. 1**) has yet to be addressed systematically. To this end, seven cell-free systems  
279 were generated, recapitulating cell cycle milestones from pro-metaphase to late S-phase.  
280 Degradation of E2F8 was assayed alongside Securin and p27/Kip1. The latter was used as a  
281 positive control for SCF<sup>Skp2</sup> activity (Carrano, Eytan et al., 1999). To minimize non-  
282 physiological variabilities, protein concentrations of all extracts were matched (+/- 10%),



283 only Ubiquitin and energy-regeneration mixture were supplemented to the reactions, and  
284 all assays were performed at 28°. The stability of E2F8 and delayed proteolysis of Securin in  
285 pro-metaphase extracts (Pro-M) were both expected at 28°C (**Fig. 7A and Fig. 2B and D**).  
286 The stability of E2F8 in G1-S extracts and in all the three S-phase extracts was in agreement  
287 with the temporal dynamics of the protein at these stages (**Fig. 7A and Fig. 1**). p27  
288 proteolysis validated the specific activity of mid- and late S-phase extracts. Proteolysis of  
289 both E2F8 and Securin in early-mid G1 extracts was optimal, reflecting the high APC/C<sup>Cdh1</sup>  
290 activity and lowest abundance of E2F8 associated with this stage (**Fig. 7A**). Interestingly, the  
291 degradation of Securin was slightly more efficient than E2F8 (**Fig. 7A and B**), potentially  
292 reflecting the high ubiquitination efficiency of the former protein (Rape et al., 2006). More  
293 importantly, APC/C activity has been shown to weaken during late G1 (Huang, Park et al.,  
294 2001, Rape & Kirschner, 2004). Accordingly, the half-life of Securin was indeed slightly  
295 longer in late G1 extracts, prepared 6 hours after the nocodazole release. However, while  
296 the overall degradation of Securin remained potent in late G1 extracts, E2F8 proteolysis  
297 nearly ceased (**Fig. 7A and B**). The differential stability of E2F8 vs. Securin in late G1 extracts  
298 effectively demonstrates an intrinsic mechanism by which E2F8 can accumulate while APC/C  
299 is still active, providing a mechanism for E2F8 buildup during late G1 (**Fig. 1A**).

300

### 301 ***E2F8 is regulated by SCF<sup>Cyclin F</sup> E3 ligase***

302 The reduction in E2F8 levels seen pre-mitosis (**Fig. 1**) is likely to be regulated at both  
303 transcriptional (E2F1) and post-translational levels. The SCF-family of ubiquitin ligases  
304 represent attractive candidates for mediating E2F8 destruction owing to their key roles in  
305 the cell cycle (Silverman, Skaar et al., 2012). SCF ligases utilize substrate adaptor F-box  
306 proteins that bind specific substrates and mediate their ubiquitination and degradation.

307 SCF<sup>Skp2</sup>, SCF <sup>$\beta$ -TrCP</sup>, and SCF<sup>CyclinF</sup> have all been implicated in cell cycle and are candidates for  
308 driving E2F8 downregulation pre-mitosis although none have been linked to atypical E2Fs.  
309 Among those three, several pieces of evidence nominate Cyclin F as the most likely  
310 candidate. First, Skp2 is active when E2F8 levels peaks, and E2F8 is stable in S-phase extracts  
311 that recapitulate p27 degradation, a well-established SCF<sup>Skp2</sup> substrate (**Fig. 7A**). Second,  
312 SCF <sup>$\beta$ -TrCP</sup> binds to a well-defined recognition sequence (DSGXX(X)S) that is absent in E2F8  
313 (Orian, Gonen et al., 2000, Yaron, Hatzubai et al., 1998). Third, Cyclin F peaks at G2 phase  
314 (Choudhury, Bonacci et al., 2016, D'Angiolella, Esencay et al., 2013, Galper, Rayner et al.,  
315 2017, Mavrommati, Faedda et al., 2018), concomitantly with E2F8 downregulation (**Fig. 1**).  
316 And fourth, E2F8 carries putative RxL motifs (Cy box) (**Fig. 8A**) that are known to mediate  
317 ubiquitination by SCF<sup>CyclinF</sup>. We were unable to reproduce SCF<sup>Cyclin F</sup> activity in cell extracts,  
318 and such a system has yet to be reported by others. Therefore, we examined the functional  
319 relationship between E2F8 and Cyclin F *in vivo*.  
320 E2F8 levels were elevated in cells where Cyclin F has been knocked out (KO) using CRISPR-  
321 Cas9 (**Fig. 8B**). In addition, Cyclin F overexpression reduced the levels of ectopically  
322 expressed E2F8, suggesting that Cyclin F promotes E2F8 degradation (**Fig. 8C**). To analyze  
323 endogenous E2F8, we constructed cells with doxycycline-inducible Cyclin F expression in  
324 MCF7 and T47D cell lines. In both, Cyclin F expression caused a dose-dependent decrease in  
325 E2F8 abundance (**Fig. 8D**). Together, this suggests that Cyclin F regulates E2F8 degradation  
326 via ubiquitin mediated proteolysis. Accordingly, treatment with proteasome inhibitors  
327 MG132 and bortezomib prevented the degradation of endogenous E2F8 in MCF7 cells  
328 expressing doxycycline-inducible Cyclin F (**Fig. 8E**). We conclude that Cyclin F promotes the  
329 degradation of E2F8 through the proteasome. Next, we examined E2F8 abundance in  
330 control and Cyclin F KO cells traversing G2. Cells were released from synchronization at G1/S

331 by double thymidine block and analyzed by immunoblotting. A reduction in E2F8 was  
332 evident in late S and G2-phase, prior to mitotic entry, in control cells (**Fig 8F**). However, E2F8  
333 levels persisted into mitosis in Cyclin F KO cells, strongly suggesting that the degradation of  
334 E2F8 observed in G2 is Cyclin F dependent. Owing to the role that RxL motifs often play in  
335 SCF<sup>CyclinF</sup>-mediated ubiquitination, we analyzed E2F8 variants in which the Arginine of each  
336 of the four RxL motifs was substituted with Alanine (RxL-to-AxL). Similar to the result above,  
337 Cyclin F overexpression strongly downregulated the abundance of wild-type, exogenously  
338 expressed E2F8 (**Fig. 8G**). However, the mutation of R313 resulted in limited sensitivity to  
339 Cyclin F overexpression, whereas the three other E2F8 alleles (R15A, R81A and R587A)  
340 behaved identically to the wild-type protein (**Fig. 8G**). This suggests that the regulation of  
341 E2F8 by Cyclin F is mediated, at least in part, by the RxL motif at position R313. It is  
342 noteworthy that RRL 313 is part of E2F8 DNA binding domain (**Fig. 5A**) and the expression of  
343 R313 mutant was lower compared to all other mutated variants (**Fig. 8F**). While the possible  
344 impact of an R313A mutation on the overall structure of E2F8 cannot be ignored, E2F8  
345 carrying mutation in both DNA binding domains was degraded by APC/C<sup>Cdh1</sup> (**Fig. S3**).  
346 We next analyzed the possibility that E2F8 and Cyclin F interact. We expressed FLAG-Cyclin F  
347 and 6HIS-E2F8-HA in HEK293T cells and analyzed their interaction by co-IP. We detected an  
348 interaction between the two proteins, irrespective of which protein was precipitated (**Fig.**  
349 **8H and 8I**), suggesting that E2F8 binds Cyclin F. Taken together, these data strongly suggest  
350 that E2F8 regulation by Cyclin F is direct and that SCF<sup>Cyclin F</sup> activity downregulates E2F8 prior  
351 to M-phase entry. These data complement the recent discovery that E2F1 and other  
352 members of the activating branch of the E2F family are targeted for proteasomal  
353 degradation by the SCF<sup>Cyclin F</sup> complex (Clijsters, Hoencamp et al., 2019).  
354

## 355 Discussion

356 In this study, we developed and utilized human cell-free systems, faithfully  
357 recapitulating the post-translational signaling that underlies the core of the cell cycle  
358 oscillator, most notably, the phosphorylation and ubiquitination events that promote  
359 human cell cycle progression. We discovered multiple mechanisms underlying temporal  
360 proteolysis of E2F8 in proliferating cells, with relevance to the overall coregulation between  
361 E2F8, E2F1 and the cell cycle clock.

362 Dynamic mitotic extracts were highly informative, revealing orderly phosphorylation,  
363 dephosphorylation and proteolysis of E2F8 while traversing spindle checkpoint inactivation,  
364 the APC/C<sup>Cdc20</sup>-to-APC/C<sup>Cdh1</sup> switch, and G1 entry (**Fig. 2**). To the best of our knowledge, a  
365 complete transition of cell extracts from pro-metaphase to G1 has not been demonstrated  
366 in somatic cell systems. A complementary system generated from anaphase-like cells (NDB)  
367 allowed us to investigate E2F8 under 'static' environment of high Cdk1 and APC/C<sup>Cdc20</sup>  
368 activity (**Fig. 3**). Using these two cell-free systems we i) identified T20 and T44 as Cdk1  
369 phosphorylation sites (**Fig. 6**); ii) demonstrated that E2F8 is regulated specifically by  
370 APC/C<sup>Cdh1</sup>, and not APC/C<sup>Cdc20</sup> (**Fig. 3**); and iii) coupled temporal proteolysis of E2F8 with  
371 mitotic exit dephosphorylation and APC/C<sup>Cdh1</sup> activation (**Fig. 2**). In the context of Cdc20-  
372 specific activity, NDB extracts are particularly advantageous. First, this system obviates  
373 dependency on *in vivo* assays in which Cdc20, an essential protein with a substantial impact  
374 on the cell cycle, is either overexpressed or knocked-down for dozens of hours. Second, it  
375 enabled us to demonstrate that E2F8, although low-leveled, is, in fact, stable in pro-  
376 metaphase and early mitosis (**Figs. 1 and 3**). This uncommon phenomenon is difficult to  
377 detect *in vivo*, let alone for a protein whose half-life during both G2 and G1 is short (**Figs. 1,**  
378 **7 and 8**).

379           Using G1 extracts, we found E2F8 ubiquitination to be primarily K11-linked (**Fig. 4**),  
380 mapped three destruction motifs in E2F8 and ranked their individual and cooperative  
381 contribution to APC/C<sup>Cdh1</sup>-mediated proteolysis (**Fig. 5**). Importantly, we discovered that  
382 phosphomimetic E2F8 is stable in G1 (**Fig. 6**). This finding, together with the  
383 dephosphorylation dynamics revealed prior to E2F8 proteolysis during mitotic exit (**Fig. 2**),  
384 suggests that dephosphorylation of E2F8 is a necessary pre-requisite for its degradation by  
385 APC/C<sup>Cdh1</sup>. That S/T20 and T44 Cdk1 phosphorylation sites are conserved in atypical E2Fs  
386 across vertebrates, further suggests that this molecular switch is fundamental and likely  
387 applies to E2F7. Experiments in G1 extracts also illuminated an unexpected role for  
388 dimerization domains in E2F8 proteolysis (**Fig. S3**). Whether these results genuinely couple  
389 E2F8 dimerization with degradation or, alternatively, mirror a global structural change with  
390 implications on folding, function, and regulation of E2F8, await further investigation (see  
391 **Figure S3** for more details).

392           The half-life of E2F8 in G1 was analyzed in two distinct points (**Fig. 7**). In early-mid G1  
393 extracts, E2F8 proteolysis was optimal, although slightly less efficient than Securin. In late  
394 G1, however, E2F8 proteolysis nearly ceased while the overall degradation of Securin stayed  
395 potent (**Fig. 7B**). These dynamics demonstrate that E2F8, unlike Securin and probably other  
396 APC/C substrates, is differentially stabilized during late G1, concomitantly with the declining  
397 activity of APC/C (Meyer & Rape, 2011, Rape & Kirschner, 2004). Because E2F1 is already  
398 active at this stage, this feature, by itself, allows E2F8 to accumulate and potentially  
399 coregulate S-phase entry while APC/C<sup>Cdh1</sup> is still active (**Fig. 1**). Enhanced stability under  
400 sub-optimal APC/C activity is a feature of 'distributive' APC/C<sup>Cdh1</sup> targets, *i.e.*, substrates that  
401 must associate with the APC/C multiple times to obtain a proteolytic ubiquitin chain, *e.g.*,  
402 Cyclin A. (Rape et al., 2006). Consequently, distributive substrates are the first to become

403 stable under limited APC/C activity because of i) the higher chance of deubiquitinating  
404 isopeptidases to strip the emerging ubiquitin chains; and ii) the competition with  
405 'processive' substrates like Securin, which undergo multi-ubiquitination in single binding  
406 event (Meyer & Rape, 2011). Interestingly, both E2F8 and Cyclin A are E2F1 target regulating  
407 the G1-S transition. The early rise of E2F1 in G1 is hard to reconcile with previous *in vivo*  
408 studies, suggesting that E2F1 is an APC/C<sup>Cdh1</sup> target (Budhavarapu, White et al., 2012). We  
409 further note that E2F1, unlike E2F8 and E2F7, is stable in G1 extracts (**Fig. S1**).

410 E2F8 was stable in all three S-phase extracts, in accord with the high levels of the  
411 protein throughout S-phase (**Fig. 1**). These results suggest that E2F8 dynamics in  
412 continuously proliferating cells is less likely to be regulated by SCF<sup>Skp2</sup>-mediated  
413 ubiquitination (**Fig. 7A**). Both E2F1 and E2F8 levels diminished before pro-metaphase (**Fig.**  
414 **1**). This temporal dynamic is rare among the more than 100 known APC/C targets (Meyer &  
415 Rape, 2011). While SCF<sup>Cyclin F</sup>-mediated proteolysis accounts for E2F1 reduction during late-S  
416 and G2 phases (Clijsters et al., 2019), how atypical E2Fs are regulated in G2 was unknown.  
417 Here, we show that Cyclin F interacts and downregulates E2F8 in a proteasome dependent  
418 manner (**Fig. 8**), implying a direct link between E2F8 and SCF<sup>Cyclin F</sup>-mediated ubiquitination.  
419 The elevated levels of E2F8 observed in Cyclin F-KO cells during G2, where Cyclin F protein  
420 peaks, further emphasize the capacity of SCF<sup>Cyclin F</sup> to downregulate E2F8 pre-mitosis.

421 Altogether, our findings support the model depicted in Figure 9. SCF<sup>Cyclin F</sup>  
422 downregulates E2F8 in G2, following E2F1 reduction. Since Cyclin F is degraded in mitosis,  
423 low-leveled E2F8 remains stable during early mitosis when APC/C<sup>Cdc20</sup> is active.  
424 Conceptually, this mechanism can allow E2F8 to block residual, unwanted E2F1 activity  
425 before cell division is successfully terminated, and is consistent with overactivation of E2F1  
426 having negative consequences on chromosome segregation fidelity (Manning, Longworth et

427 al., 2010, Pfister, Pipka et al., 2018). Cdk1 phosphorylates E2F8 on Thr 20 and Thr 44 during  
428 mitotic entry. This module has a stabilizing effect on E2F8. Cdk1 activity dropped during  
429 mitotic exit. Subsequent dephosphorylation of both E2F8 and Cdh1 triggers E2F8  
430 degradation by APC/C<sup>Cdh1</sup>. E2F1 accumulates in early-mid G1 under high APC/C<sup>Cdh1</sup> activity,  
431 inducing its own expression alongside expression of E2F8, E2F7 and other target genes that  
432 promote S-phase entry (*e.g.*, Cdc6, Cyclin E). As long as E2F7 and E2F8 are destabilized by  
433 APC/C<sup>Cdh1</sup>, E2F1 activity is unrestrained. Maximizing transcription capacity at this stage  
434 might be critical for low-leveled E2F1 to ignite the positive feedback required for its  
435 autocatalytic increase that drives cells into S-phase (Johnson, Ohtani et al., 1994). E2F8 is  
436 differentially stabilized under limited APC/C<sup>Cdh1</sup> activity associated with late G1. This feature  
437 allows E2F8 to accumulate during late G1, while APC/C<sup>Cdh1</sup> is still active and mediate  
438 proteolysis of Securin and probably other substrates. Because E2F1 levels are already high,  
439 the E2F1-E2F8 negative feedback can be formed already in G1 to balance the transcriptional  
440 activity of E2F1. Overall, these inter-dynamics ensure a safe transition into S-phase (**Fig. 9**).  
441 In this study we focused on E2F8. However, owing to the overall similarity of atypical E2Fs, it  
442 is easy to speculate that the model herein applied to E2F7 as well.

443

444

445 **Acknowledgements**

446 We thank Tamar Listovsky-Yulzary, Doron Ginsberg, Vamsi Mootha and Yaron Shav-Tal for  
447 sharing reagents. The Tzur lab is supported by the Israel Cancer Research Fund (ICRF), Grant  
448 no. RCDA00102, and the Israel Science Foundation (ISF) Grant no. 659/16. The Emanuele lab  
449 is supported by the UNC University Cancer Research Fund, National Institutes of Health  
450 (R01GM120309), American Cancer Society (RSG-18-220-01-TBG) and donations from the  
451 Brookside Foundation.

452

453 **Author contributions**

454 D.W., S.N., M.C., T.P.E., M.N.H., J.P., S.Z.P., N.A., E.C., N.L.D., H.N., D.G., M.J.E., and A.T.  
455 designed the research.

456 D.W., S.N., M.C., T.P.E., M.N.H., J.P., S.Z.P., N.A., E.C., N.L.D., X.W., H.N., and R.L. performed  
457 the research.

458 D.W., S.N., M.C., T.P.E., M.N.H., J.P., S.Z.P., N.A., E.C., D.G., M.J.E., and A.T. contributed new  
459 reagents or analytic tools.

460 D.W., S.N., M.C., T.P.E., M.N.H., J.P., S.Z.P., N.A., E.C., N.L.D., X.W., H.N., and R.L. analyzed  
461 the data.

462 D.W., S.N., M.N.H., M.J.E., and A.T. wrote the paper.

463

464 **Competing interests**

465 The authors declare no competing interests.

466



## 467 **Material and Methods**

### 468 **Plasmids**

469 The following plasmids were used in previous studies: 1) pCS2-FA-E2F8 (Cohen et al., 2013);  
470 2) pCS2-FA-E2F7 (Cohen et al., 2013); 3) pCS2-FA-Securin (Pe'er et al., 2013); 4) pCS2-Tome-  
471 1 (*Xenopus laevis*) (Ayad et al., 2003); 5) FLAG-Cyclin F (Choudhury et al., 2016). Histone  
472 H2B-YFP plasmid was a gift from Yaron Shav-Tal (Bar-Ilan University). The following plasmids  
473 were generated for this study: 1) pCS2-FA-E2F8-EGFP; E2F8 open reading frame (ORF) was  
474 amplified by polymerase chain reaction (PCR) using pCS2-FA-E2F8 as a template and primers  
475 flanked with FseI (forward) and AgeI (reverse) restriction enzyme (RE) sites, and cloned into  
476 pCS2-FA-EGFP vector; 2) pCS2-FA-P27; ORF of p27 was amplified from cDNA template (Open  
477 Biosystems) and cloned into pCS2-FA vector using FseI (5') and Ascl (3') RE; 3) pCS2-FA-His-  
478 E2F8-HA; E2F8 ORF was amplified with a forward primer flanked with FseI RE site and a  
479 reverse primer flanked with HA tag followed by Ascl RE site. The PCR product was cloned  
480 downstream to His tag; 4) pCS2-His-E2F8-N80-EGFP; The ORF encoding for amino acid 1-80  
481 of E2F8 was amplified using pCS2-FA-E2F8 template, and a primer set flanked with FseI  
482 (forward) and AgeI (reverse) RE sites. The PCR product was cloned into pCS2-FA-EGFP vector  
483 downstream to His tag and upstream to EGFP; 5) pCS2-E2F8-C; The ORF encoding for amino  
484 acid 607-867 of E2F8 were amplified using pCS2-FA-E2F8 template and a primer set flanked  
485 with FseI (forward) and AgeI (reverse) RE sites. The PCR product was cloned in frame with  
486 an upstream His tag and downstream EGFP tag in a pCS2-FA vector; 6) pcDNA-E2F1; the ORF  
487 of human E2F1 was amplified using E2F1 cDNA [a gift from Doron Ginsberg (Bar Ilan  
488 University)] and a primer set flanked with KpnI (forward) and EcoRI (reverse) RE sites. The  
489 PCR product was cloned into pcDNA3.1(+) vector. The following E2F8 mutant variants were  
490 generated using pCS2-FA-E2F8 as a template: 1) KEN mutant E2F8-KM1 (<sup>5</sup>KEN<sup>7</sup> to AAN); 2)

491 KEN mutant E2F8-KM2 (<sup>375</sup>KEN<sup>377</sup> to AAN); 3) KEN mutant E2F8-KM3 (<sup>657</sup>KEN<sup>659</sup> to AAN); 4)  
492 RXXL mutant 1 (D-box mutant 1) E2F8-DM1 (<sup>87</sup>RXXL<sup>90</sup> to GXXV); 5) RXXL mutant 2 (D-box  
493 mutant 2) E2F8-DM2 (<sup>183</sup>RXXL<sup>186</sup> to GXXV); 6) E2F8-DM1-DM2; 7) E2F8-KM1-KM2; 8) E2F8-  
494 KM1-DM2; 9) E2F8-KM2-DM2; 10) E2F8-KM3-DM2; 11) DNA-binding domain double mutant  
495 E2F8-DBD (<sup>155</sup>RRIYD<sup>159</sup> and <sup>313</sup>RRLYD<sup>317</sup> to AAIYD and AALYD); 12) Dimerization domain  
496 double mutant E2F8-DD (deletion of <sup>162</sup>NVL<sup>164</sup> and <sup>320</sup>NVL<sup>322</sup>); 13) E2F8-DBD-DD (quadruple  
497 mutant); 14) E2F8-T20A (Thy 20 to Ala); 15) E2F8-T20D (Thy 20 to Asp); 16) E2F8-T44A (Thy  
498 44 to Ala); 17) E2F8-T44D (Thy 44 to Asp); 18) E2F8-T20A-T44A (double mutant); 19) E2F8-  
499 T20D-T44D (double mutant); 20) Cy box mutant 1 – E2F8-CB1 (<sup>15</sup>RGL<sup>17</sup> to AGL); 21) Cy box  
500 mutant 2 – E2F8-CB2 (<sup>81</sup>RGL<sup>83</sup> to AGL); 22) Cy box mutant 3 – E2F8-CB2 (<sup>313</sup>RRL<sup>315</sup> to ARL);  
501 23) Cy box mutant 4 – E2F8-CB4 (<sup>857</sup>RKL<sup>859</sup> to AKL). The following E2F8 variants were  
502 generated using pCS2-FA-His-E2F8-HA as a template: 1) E2F8-CB1; 2) E2F8-CB2; 3) E2F8-  
503 CB3; 4) E2F8-CB4. The following E2F8-N80 variants were generated using pCS2-His-E2F8-  
504 N80-EGFP as a template: 1) E2F8-N80-KM1 (<sup>5</sup>KEN<sup>7</sup> to AAN); 2) E2F8-N80-T20A (Thy 20 to  
505 Ala); 3) E2F8-N80-T20D (Thy 20 to Asp); 4) E2F8-N80-T44A (Thy 44 to Ala); 5) E2F8-N80-  
506 T44D (Thy 44 to Asp); 6) E2F8-N80-T20A-T44A (double mutant); 7) E2F8-N80-T20D-T44D  
507 (double mutant). Overall, 40 new plasmids were generated. Aside from Tome-1, all ORFs  
508 were of human origin. All mutations were generated by site-directed mutagenesis (Agilent;  
509 #20521). Cloning and mutageneses were validated by Sanger sequencing. A full list of DNA  
510 oligos used for cloning is provided as supplementary information (**Table 1**).

511

512

513

514

515 **Cell culture**

516 HeLa S3 (S3), HEK293T were originally from the ATCC. 293-T-REx™ cells were a gift from  
517 Vamsi Mootha (Harvard Medical School). All cell lines were cultured in Dulbecco's modified  
518 Eagles medium (DMEM) supplemented with 10% fetal bovine serum, 2 mM L-Glutamine and  
519 1% penicillin-streptomycin solution. Cells were maintained at 37°C in a humidified 5% CO<sub>2</sub>-  
520 containing atmosphere. S3 cells were either cultured on plates or in 1L glass spinner flasks in  
521 suspension (80 rpm). 293-T-REx™ cells were cultured in the presence of 5 µg/mL blasticidin  
522 (Gibco; #A11139-03) to maintain the pcDNA™6/TR plasmid carrying the ORF for tetracycline  
523 (Tet) repressor. The derivation of the Cyclin F knockout cell lines using CRISPR/Cas9 gene  
524 editing technology was previously described (Choudhury et al., 2016).

525

526 **Generation of non-degradable cyclin B1 cell line (NDB)**

527 293-T-REx™ were stably transfected with pcDNA™4/TO plasmid carrying an open reading  
528 frame (ORF) of a destruction-box mutant (DM) Cyclin B1 (Arg 42 and Leu 45 were  
529 substituted with Gly and Val, respectively) and a zeocin resistance gene. The ORF of cyclin  
530 B1-DM was amplified by PCR using the pCS2-FA-Cyclin B1-DM plasmid (Pe'er et al., 2013) as  
531 a template and a primer set flanked with RE sites for BamHI (forward) and XhoI (reverse).  
532 Zeocin concentration for selection: 200 µg/ml (BioBasic; # Z706211). NDB cells were stably  
533 transfected with a plasmid carrying the ORF of Histone H2B-YFP and a neomycin resistance  
534 gene. Stably transfected cells were selected by 500 µg/ml G418 (Formedium; #108321-42-  
535 2). NDB and NDB-H2B-YFP cell lines were originated from a single cell.

536

537

538

## 539 **Generation of inducible Cyclin F cell line**

540 Cyclin F was cloned by gateway recombination cloning into pINDUCER20 (Meerbrey, Hu et al.,  
541 2011). Lentiviral particles were produced in HEK293T cells by transfecting cells with  
542 pINDUCER20-Cyclin F, as well as separate plasmids containing TAT, REV, VSVg and gag-pol.  
543 Viral particles were used to transduce MCF7 and T47D cells, which were subsequently  
544 selected with geneticin (Gibco #10131-035). Cyclin F expression was induced by the addition  
545 of doxycycline (5 ng/mL, 25 ng/mL, or 100 ng/mL) to the media for 48 hours and cells were  
546 analyzed by immunoblot. For *in vivo* experiments, MG132 (UBP Bio; #F1101) and bortezomib  
547 (Sigma-Aldrich; #5043140001) were used at a final concentration of 50  $\mu$ M and 100 nM,  
548 respectively.

549

## 550 **Cell synchronization**

551 ***Synchronization of S3 cells for mitotic extracts.*** A 400-500 ml culture of S3 cells was grown  
552 in suspension (1 L spinner flask, 85 rpm) until population reached a density of about  $2.5 \times$   
553  $10^5$  cells/ml. Cells were then treated with 2 mM thymidine (Sigma-Aldrich; #T9250) for 22 h,  
554 washed and released into pre-warmed fresh media. After 3 h, cells were incubated with 50  
555 ng/ml nocodazole (Sigma-Aldrich; #M1404) for 11-12 h, and harvested for mitotic extract  
556 preparation.

557 ***Synchronization of S3 cells for G1 extracts.*** Nocodazole-arrested cells (see previous  
558 paragraphed) were washed, recultured in 400-500 ml pre-warm fresh media, and harvested  
559 after 3.5 h for G1 extract preparation. Cells extracts were also generated from cells 6 and  
560 8.5 h after release from nocodazole block.

561 ***Synchronization of S3 cells for S-phase extracts.*** S3 cells were cultured in suspension until  
562 population reached a density of approximately  $5 \times 10^5$  cells/ml. Cells were then incubated

563 with 2 mM thymidine for 22 h, washed and released into pre-warmed fresh media for 9 h,  
564 and blocked again with 2 mM thymidine for 19 h. Cells were either harvested for extract  
565 preparation or released from the second thymidine block for 3 or 6 h and then harvested.

566 ***Synchronization of NDB cells in late mitosis.*** NDB cells were cultured in 15 cm/diameter  
567 plates. After reaching a confluency of about 75%, the cells were treated with 1 µg/ml  
568 tetracycline (Sigma-Aldrich; #87128) for 22 h and harvested for extract preparation or any  
569 other purpose.

570 ***Synchronization of NDB cells in pro-metaphase.*** NDB cells at 75% confluency were treated  
571 with 100 ng/ml nocodazole for 18 h.

572 ***Synchronization of NDB cells in G1.*** Asynchronous NDB cells showing the lowest 10%  
573 forward scatter width (FSC-W) signal were isolated by FACSAria III (BD). This sorting protocol  
574 yields a nearly pure G1 population without pre-synchronization (Vecsler, Lazar et al., 2013).

575 ***Synchronization of S3 cells for Western blotting.*** S3 cells arrested by thymidine-nocodazole  
576 block or double thymidine block (see above) were washed and either harvested (t = 0) or  
577 recultured for 30 min to 11 h, and then harvested.

578

## 579 **Live cell imaging**

580 For light phase images, we used a Nikon eclipse TS100 inverted microscope equipped with x  
581 20 (NA: 0.4) and x 40 (NA: 0.55) LWD lenses, a Nikon Digital-Slight DS-Fi1 camera, and a  
582 Nikon C-HGFI Intensilight. Images were processed by ImageJ software.

583 Spread chromosomes were visualized using a Nikon Eclipse Ti-E inverted microscope  
584 equipped with x100 oil lens (NA: 1.4) or x40 Oil lens (NA: 1.3), Lumencor illuminator LED  
585 light source, and a Zyla sCMOS camera (Andor Technology). Filter sets: excitation 390/18  
586 nm; emission 460/50 nm. Images were processed by Nikon NIS-element and ImageJ

587 software. Time-lapse microscopy of NDB was performed with a Leica SP8 inverted scanning  
588 confocal microscope equipped with an x63 oil lens (NA: 1.4), and HyD detector. Excitation:  
589 488 nm laser. Emission: 511-552 nm. Images were acquired and processed using *LASX and*  
590 *ImageJ software*.

591

## 592 **Flow cytometry**

593 Overall, cell synchronization was measured by DNA quantification following a standard  
594 propidium iodide (PI) staining protocol (Sigma-Aldrich; #81845). Gallios (Beckman Coulter)  
595 and FACS Aria III (BD) flow cytometers were used for analyzing the stained cells. Cell cycle  
596 phase distribution was determined by ModFit LT™'s Sync Wizard model (Verity Software  
597 House). FACS Aria III was also used to sort G1 NDB cells for Western blot analysis (see above)  
598 and for sorting single NDB and NDB-H2B-YFP cells.

599

## 600 **Chromosome spread**

601 Tet-induced- and nocodazole-arrested NDB cells (see above) were harvested by gentle  
602 pipetting, washed gently with PBS, lysed in hypotonic solution (0.8% KCl, 10 min at room  
603 temperature) and fixed in a methanol/glacial acetic acid solution (3:1 volume ratio). Cell  
604 droplets were released from one-meter height onto tilted glass slides. The slides were air-  
605 dried and mounted with a mounting solution (Thermo Fisher Scientific; 4112APG) and DAPI  
606 stain [5 µg/ml (Sigma- Aldrich; #P9542)].

607

## 608 **Western blotting**

609 **Protein lysis.** Cells were washed twice in cold PBS and lysed in a cold lysis buffer (50 mM Tris  
610 pH 7.6, 150 mM NaCl, 5 mM EDTA pH8.0, 0.5% NP-40) supplemented with a protease

611 inhibitor cocktail (Roche; #4693159001), 1 mM phenylmethylsulfonyl fluoride (PMSF),  
612 phosphatase inhibitor cocktail (Sigma-Aldrich; #P5726, #P0044), 10 mM NaF; 20 mM  $\beta$ -  
613 glycerophosphate; 1 mM Na<sub>3</sub>VO<sub>4</sub>, 20 mM P-nitrophenylphosphate (PNPP). Protein extracts  
614 were incubated on ice for 30 min and the non-soluble components were pelleted by  
615 centrifugation for 45 minutes at 14,000 x g. Protein concentration was determined by a  
616 standard Bradford assay (Bio-Rad #500-0006), a linear BSA calibration curve, and an Epoch  
617 microplate spectrophotometer.

618 **Immunoblotting.** Protein samples were mixed with Laemmli buffer, denatured (5-10  
619 min, 95°C) and resolved on freshly-made 8-10% acrylamide gels using a Tris-glycine  
620 running buffer. Proteins were then electro-transferred onto a nitrocellulose membrane (Bio-  
621 Rad; #162-0115) using a wet transfer or Trans-Blot Turbo™ transfer system (Bio-Rad).  
622 Transfer quality was verified by Ponceau S Solution (Sigma- Aldrich; #81462). Membranes  
623 were washed, blocked (5% skimmed milk in TBST) and incubated overnight (4°) with  
624 antibody solution (2.5% BSA and 0.05% Sodium Azide in PBS). The following primary  
625 antibodies were used: anti-Tubulin (DSHB; #12G10,), anti-Actin (DSHB; #JLA20), anti-HSP70  
626 (Santa Cruz Biotechnology; #SC-24), anti-GAPDH (Santa Cruz Biotechnology; #SC-47724),  
627 anti-E2F8 (Abnova; #H00079733-M01 and Abcam; #AB109565), anti-E2F1 (Santa  
628 Cruz Biotechnology; #SC-193), anti-Securin (Abcam; #AB3305), anti-Geminin (Abcam;  
629 #AB12147), anti-Kifc1 (Bethyl Laboratories; #A300-951A), anti-Cyclin B1 (Santa Cruz  
630 Biotechnology; #SC-70898) anti-Cdc20 (Santa Cruz Biotechnology; #SC-8358), anti-Cdh1  
631 (Calibochem; #CC43-100UG), anti-Cdc27 (Santa Cruz Biotechnology #SC-5618 and SC-9972),  
632 anti-Cyclin F (Santa Cruz Biotechnology; #SC-952), anti-HA (Biolegend; #901502); anti-FLAG  
633 (Sigma; #A8592). Horseradish peroxidase-conjugated (HRP) secondary antibodies were  
634 purchased from Jackson ImmunoResearch: #115-035-174; #115-035-144; #115-035-003).

635 ECL signal was detected by a SuperSignal West Femtochemiluminescence substrate (Pierce;  
636 #34095) or an EZ-ECL (Biological Industries; #20-500-171).

637

### 638 **Immunoprecipitation**

639 APC/C was immunoprecipitated from NDB mitotic extracts pre- and post 30 min incubation  
640 with RO-3306 (see above). To this end, 200 µg cellular extracts were mixed with 300 µl wash  
641 buffer (150 mM NaCl, 20 mM Tris HCl pH=7.5, 10% glycerol, 0.1% Triton, EDTA 1 mM) and  
642 protease inhibitor cocktail (Sigma-Aldrich; #p2714-1BTL). Next, 15 µl agarose-conjugated  
643 anti-Cdc27 antibodies (Santa Cruz Biotechnology; SC-9972AC) were incubated with the  
644 diluted extracts for 4 h at 4°C. Beads were washed twice with 150 mM NaCl wash buffer and  
645 once with 75 mM wash buffer, resuspended with 4x Laemmli sample buffer and denatured  
646 10 min at 96°C. Protein samples were resolved by SDS-PAGE.

647 **HA/FLAG immunoprecipitation.** HEK293T cells were transfected with the indicated plasmids  
648 using PolyJet DNA *in vitro* transfection reagent (SignaGen #SL1000688). 24 hours post-  
649 transfection, cells were harvested, lysed in NETN buffer [20 mM Tris, pH 8.0, 100 mM  
650 NaCl, 0.5 mM EDTA, 0.5% NP40, 2 µg/mL pepstatin, 2 µg/mL apoprotinin, 10 µg/mL  
651 leupeptin, 1.0 mM 4-(2 aminoethyl) benzenesulfonyl fluoride, 1.0 mM Na<sub>3</sub>VO<sub>4</sub>] and  
652 immunoprecipitated with EZview Red anti-HA or EZview Red anti-FLAG M2 affinity gel  
653 (Sigma #E6779; #F2426). IPs were performed for 2 hours at four degrees, washed 5 times in  
654 cold NETN buffer by rotating for 5 minutes each time, and eluted in Laemmli buffer, prior to  
655 analysis by immunoblot.

656

657

658



659 **Preparation of cell extracts**

660 **HeLa S3 extracts.** Synchronous S3 cells were washed with cold PBS and lysed in a swelling  
661 buffer [20 mM Hepes pH 7.5, 2 mM MgCl<sub>2</sub>, 5 mM KCl, 1 mM DTT, and protease inhibitor  
662 cocktail (Roche; #11836170001)] supplemented with energy regenerating mixture (1 mM  
663 ATP, 0.1 mM EGTA, 1 mM MgCl<sub>2</sub>, 7.5 mM creatine phosphate, 50 µg/ml creatine  
664 phosphokinase). Cells were swelled on ice for 30 min and homogenized by freeze-thawing in  
665 liquid nitrogen and passed through a 21G needle 10 times. Extracts were cleared by  
666 subsequent centrifugations (14,000 RPM; 10 and 40 min), and stored at -80°.

667 **NDB mitotic extracts.** Tet-induced NDB cells were harvested from twenty 150 mm plates.  
668 Cells were washed gently with cold PBS and lysed for extract preparation (see previous  
669 paragraph).

670 **NDB G1-like extracts.** NDB mitotic extracts (see above) were pre-activated with RO-3306  
671 for 15 to 30 min. This treatment overrides the blocking effect of non-degradable Cyclin B1,  
672 and effectively induces mitotic exit into an APC/C<sup>Cdh1</sup>-active state in tube. Only then *in vitro*  
673 translated (IVT) substrates were added to the reaction mixture for degradation assays.

674

675 **Degradation and mobility shift assays**

676 Target proteins were *in vitro* transcribed and translated in rabbit reticulocyte lysate (TNT-  
677 coupled reticulocyte system; Promega; #L4600, #L4610) supplemented with <sup>35</sup>S-Methionine  
678 (IsoLabel L-35S Steady Blue, Izotop; #TSM-01). Degradation assays were performed in 20 µl  
679 cell extracts supplemented with 1 µl of x20 energy regenerating mixture (see above), 1 µl of  
680 10 mg/ml Ubiquitin (Ub) solution (Boston Biochem; #U-100H) and 1 µl radiolabeled IVT  
681 product of interest. As indicated, reaction mixture were supplemented with one or more of  
682 the following reagents: 1) recombinant His-tagged UbcH10 or UbcH10<sup>DN</sup> (5 µg); 2)

683 recombinant GST-tagged Emi1 C-terminus (1 µg); 3) Cdk1 inhibitor RO-3306 [(15-30 µM);  
684 Enzo Life Sciences; #ALX-270-463-M001]; 4) MG132 [(20 µM); Boston Biochem; #I-130];  
685 and 5) DMSO. Reaction mixture were incubated at 28°C, unless otherwise is indicated.  
686 Aliquots of 3-5 µl were taken every 10 to 20 min, mixed with Laemmli buffer, denatured (10  
687 min, 95°C), and were quickly frozen in liquid nitrogen. Protein samples were resolved by  
688 SDS-PAGE. Gels were soaked in a methanol/acetic acid (10%/7.5%) solution for 20 min,  
689 dried in vacuum and heat, and exposed to phosphor screen. IVT proteins were visualized by  
690 autoradiography using Typhoon™ FLA 9500 phosphorimager (GE Healthcare Life Sciences).  
691 Signal intensity was measured by ImageJ software after background subtraction, and  
692 normalized to <sup>35</sup>S signal at time 0 min (t<sub>0</sub>). All plots were created in Microsoft Excel  
693 software, version 16.20. Mean and standard error (SE) were calculated from three or four  
694 independent degradation assays.

695

#### 696 **On-chip ubiquitination and Ub-chain preference assays**

697 **Mold Fabrication:** The device was designed using AutoCAD 2011 (Autodesk, Inc.) and each  
698 layer was reproduced as a chrome mask at 40,000 dpi (Fineline-Imaging). Flow molds were  
699 fabricated on 4" silicon wafers (Silicon Quest International) with pretreatment of O<sub>2</sub> plasma  
700 34% for 5 min. The wafers were spin-coated with SPR 220-7 (Shipley; 1500 rpm, 60 sec)  
701 yielding a substrate height of around 13-15 µm. The molds were baked at 105°C for 6 min  
702 followed by a 120 sec I-line exposure on a MA6 contact mask aligner (Karl Suss). Next, molds  
703 were incubated for 2 hrs in RT, baked in 110°C for 5 min, incubate for additional 45 min at  
704 RT, and developed with AZ 726 MIF Developer followed by DW H<sub>2</sub>O wash. Finally, molds  
705 were annealed at ramping temp (70-200°C; 10°C/h) for 15 hrs. Control molds were  
706 fabricated on 4" silicon wafers by spin coating SU-8 2025/3025 (MicroChem) at 500 rpm for

707 5 sec followed by 3000 rpm for 70 sec yielding a substrate height of around 15-18  $\mu\text{m}$ . The  
708 molds were baked at 65°C for 2 min and 95°C for 7 min. Next, the wafers were exposed for  
709 15 sec on the mask aligner, followed by a post-exposure baking series of 65°C for 1 min and  
710 95°C for 3 min. The wafers were developed in AZ EBR Solvent for 4.5 min followed by an  
711 isopropanol wash. At the end of the fabrication step, control and flow molds were Teflon  
712 coated to promote elastomer release during following use.

713 **Device Fabrication:** The microfluidic devices were fabricated on silicone molds casting  
714 silicone elastomer polydimethylsiloxane (PDMS, SYLGARD 184®, Dow Corning). Each device  
715 consists of 2 aligned PDMS layers: the flow and the control layer. A mixture of a silicone-  
716 based elastomer and curing agent was prepared in 2 different ratios 5:1 and 20:1 for the  
717 control and flow molds, respectively. The control layer was degassed and baked for 30 min  
718 at 80°C /60 min at 90°C. The flow layer was initially spin coated (Laurell Technologies) at  
719 1500-2000 rpm for 60 sec and then baked at 80°C for 30 min. The control layer was  
720 separated from its mold and then control channel access holes were punched. The flow and  
721 control layers were aligned manually and baked for 2 h at 80°C. The 2-layer device (chip)  
722 was peeled from the flow mold and flow channels access holes were punched.

723 **Surface Chemistry:** In order to bind the expressed protein, we first cover the epoxy slides  
724 with biotinylated BSA (1  $\mu\text{g}/\mu\text{l}$ , Thermo Scientific). Streptavidin (0.5  $\mu\text{g}/\mu\text{l}$  Neutravidin,  
725 Pierce) was then introduced, to interact with the biotinylated BSA layer. Next, a designated  
726 set of pneumatic valves, also known as ‘button valves’ (Noach-Hirsh et al., 2015), were  
727 closed and a layer of biotinylated PEG (1  $\mu\text{g}/\mu\text{l}$ , Nanocs) was used to block the protein  
728 chamber periphery, leaving the center itself exposed to avidin to which antibodies and  
729 eventually target proteins can be attached. Then, the button valves were opened and anti-  
730 GFP biotinylated antibodies (0.2  $\mu\text{g}/\mu\text{l}$ , Abcam; #ab6658) were flowed through the device to

731 interact with the exposed avidin at the protein chamber center. This creates an array of  
732 protein chamber with anti GFP antibodies to which EGFP-tagged E2F8 IVT product can bind.  
733 PBS buffer or PBS buffer with 1% BSA was used to the wash between steps.

734 **On-chip ubiquitination and ubiquitin-chain preference assays:** E2F8-EGFP IVT product was  
735 flowed into the chip and immobilized on the surface at the protein chamber via its EGFP tag,  
736 followed by a wash with a PBS buffer. S3 G1 extracts were mixed with i) 0.04 mg/ml  
737 Rhodamin-coupled Ubiquitin (Rd-Ub) (Boston Biochem; #U-600); ii) mock or 0.4 mg/ml of  
738 one of the following unlabeled Ubiquitin variants: WT (Boston Biochem; #U100-H), Lys11 to  
739 Arg mutant (Boston Biochem; #UM-K11R), Lys48 to Arg mutant (Boston Biochem; #UM-  
740 K48R), Lys63 to Arg mutant (Boston Biochem; #UM-K63R); and iii) mock or 0.3 mg/ml His-  
741 tagged Ubch10<sup>DN</sup> (recombinant) or 0.48 mg/ml GST-tagged Emi1 C-terminus (recombinant).  
742 Next, reaction mixture were flowed to protein chambers for 10 min (RT). Unbound material  
743 was washed by an Hepes buffer (50 mM). Rd-Ub levels were determined by 535 nm  
744 excitation (emission filters: 575/50). Rd-Ub signal was normalized to the immobilized  
745 protein level, as measured by 488 nm-excited GFP (emission filter: 535/25). This  
746 normalization provides net ubiquitination signal per micro-compartment. Ubiquitin-chain  
747 preference of E2F8 was validated in tube using degradation assays in S3 G1 extracts to  
748 which 8 µg Ubch10 (recombinant), and 0.4 µg WT- or mutant K-to-R Ub (see above) were  
749 added.

750 **Image and Data Analysis:** LS Reloaded microarray scanner (LS Reloaded, Tecan, Männedorf,  
751 Switzzarland) and GenePix7.0 (Molecular Devices) image analysis software were used for  
752 analysis and data esentation.

753 For more details, see Noach-Hirsh et al. (Noach-Hirsh et al., 2015).

754

755 **References**

756

- 757 Ayad NG, Rankin S, Murakami M, Jebanathirajah J, Gygi S, Kirschner MW (2003) Tome-1,  
758 a trigger of mitotic entry, is degraded during G1 via the APC. *Cell* 113: 101-13
- 759 Ayad NG, Rankin S, Ooi D, Rape M, Kirschner MW (2005) Identification of ubiquitin ligase  
760 substrates by in vitro expression cloning. *Methods Enzymol* 399: 404-14
- 761 Boekhout M, Yuan R, Wondergem AP, Segeren HA, van Liere EA, Awol N, Jansen I,  
762 Wolthuis RM, de Bruin A, Westendorp B (2016) Feedback regulation between atypical E2Fs  
763 and APC/CCdh1 coordinates cell cycle progression. *EMBO Rep* 17: 414-27
- 764 Budhavarapu VN, White ED, Mahanic CS, Chen L, Lin FT, Lin WC (2012) Regulation of  
765 E2F1 by APC/C Cdh1 via K11 linkage-specific ubiquitin chain formation. *Cell Cycle* 11:  
766 2030-8
- 767 Carrano AC, Eytan E, Hershko A, Pagano M (1999) SKP2 is required for ubiquitin-mediated  
768 degradation of the CDK inhibitor p27. *Nat Cell Biol* 1: 193-9
- 769 Chen HZ, Tsai SY, Leone G (2009) Emerging roles of E2Fs in cancer: an exit from cell cycle  
770 control. *Nat Rev Cancer* 9: 785-97
- 771 Choudhury R, Bonacci T, Arceci A, Lahiri D, Mills CA, Kernan JL, Branigan TB, DeCaprio  
772 JA, Burke DJ, Emanuele MJ (2016) APC/C and SCF(cyclin F) Constitute a Reciprocal  
773 Feedback Circuit Controlling S-Phase Entry. *Cell Rep* 16: 3359-3372
- 774 Christensen J, Cloos P, Toftegaard U, Klinkenberg D, Bracken AP, Trinh E, Heeran M, Di  
775 Stefano L, Helin K (2005) Characterization of E2F8, a novel E2F-like cell-cycle regulated  
776 repressor of E2F-activated transcription. *Nucleic Acids Res* 33: 5458-70
- 777 Clijsters L, Hoencamp C, Calis JJA, Marzio A, Handgraaf SM, Cuitino MC, Rosenberg BR,  
778 Leone G, Pagano M (2019) Cyclin F Controls Cell-Cycle Transcriptional Outputs by  
779 Directing the Degradation of the Three Activator E2Fs. *Mol Cell*
- 780 Cohen M, Vecsler M, Liberzon A, Noach M, Zlotorynski E, Tzur A (2013) Unbiased  
781 transcriptome signature of in vivo cell proliferation reveals pro- and antiproliferative gene  
782 networks. *Cell Cycle* 12: 2992-3000
- 783 D'Angiolella V, Esencay M, Pagano M (2013) A cyclin without cyclin-dependent kinases:  
784 cyclin F controls genome stability through ubiquitin-mediated proteolysis. *Trends Cell Biol*  
785 23: 135-40
- 786 de Bruin A, Maiti B, Jakoi L, Timmers C, Buerki R, Leone G (2003) Identification and  
787 characterization of E2F7, a novel mammalian E2F family member capable of blocking  
788 cellular proliferation. *J Biol Chem* 278: 42041-9
- 789 Di Stefano L, Jensen MR, Helin K (2003) E2F7, a novel E2F featuring DP-independent  
790 repression of a subset of E2F-regulated genes. *EMBO J* 22: 6289-98
- 791 Funabiki H, Murray AW (2000) The Xenopus chromokinesin Xkid is essential for metaphase  
792 chromosome alignment and must be degraded to allow anaphase chromosome movement.  
793 *Cell* 102: 411-24
- 794 Galper J, Rayner SL, Hogan AL, Fifita JA, Lee A, Chung RS, Blair IP, Yang S (2017) Cyclin  
795 F: A component of an E3 ubiquitin ligase complex with roles in neurodegeneration and  
796 cancer. *Int J Biochem Cell Biol* 89: 216-220
- 797 Grallert A, Boke E, Hagting A, Hodgson B, Connolly Y, Griffiths JR, Smith DL, Pines J,  
798 Hagan IM (2015) A PP1-PP2A phosphatase relay controls mitotic progression. *Nature* 517:  
799 94-98
- 800 Hagting A, Den Elzen N, Vodermaier HC, Waizenegger IC, Peters JM, Pines J (2002)  
801 Human securin proteolysis is controlled by the spindle checkpoint and reveals when the  
802 APC/C switches from activation by Cdc20 to Cdh1. *J Cell Biol* 157: 1125-37
- 803 Hallstrom TC, Nevins JR (2009) Balancing the decision of cell proliferation and cell fate.  
804 *Cell Cycle* 8: 532-5

- 805 Holt LJ, Krutchinsky AN, Morgan DO (2008) Positive feedback sharpens the anaphase  
806 switch. *Nature* 454: 353-7
- 807 Huang JN, Park I, Ellingson E, Littlepage LE, Pellman D (2001) Activity of the APC(Cdh1)  
808 form of the anaphase-promoting complex persists until S phase and prevents the premature  
809 expression of Cdc20p. *J Cell Biol* 154: 85-94
- 810 Jaspersen SL, Charles JF, Morgan DO (1999) Inhibitory phosphorylation of the APC  
811 regulator Hct1 is controlled by the kinase Cdc28 and the phosphatase Cdc14. *Curr Biol* 9:  
812 227-36
- 813 Jin L, Williamson A, Banerjee S, Philipp I, Rape M (2008) Mechanism of ubiquitin-chain  
814 formation by the human anaphase-promoting complex. *Cell* 133: 653-65
- 815 Johnson DG, Ohtani K, Nevins JR (1994) Autoregulatory control of E2F1 expression in  
816 response to positive and negative regulators of cell cycle progression. *Genes & development*  
817 8: 1514-25
- 818 Kernan J, Bonacci T, Emanuele MJ (2018) Who guards the guardian? Mechanisms that  
819 restrain APC/C during the cell cycle. *Biochim Biophys Acta Mol Cell Res* 1865: 1924-1933
- 820 King RW, Peters JM, Tugendreich S, Rolfe M, Hieter P, Kirschner MW (1995) A 20S  
821 complex containing CDC27 and CDC16 catalyzes the mitosis-specific conjugation of  
822 ubiquitin to cyclin B. *Cell* 81: 279-88
- 823 Kramer ER, Scheuringer N, Podtelejnikov AV, Mann M, Peters JM (2000) Mitotic regulation  
824 of the APC activator proteins CDC20 and CDH1. *Mol Biol Cell* 11: 1555-69
- 825 Kravtsova-Ivantsiv Y, Sommer T, Ciechanover A (2013) The lysine48-based polyubiquitin  
826 chain proteasomal signal: not a single child anymore. *Angew Chem Int Ed Engl* 52: 192-8
- 827 Lammens T, Li J, Leone G, De Veylder L (2009) Atypical E2Fs: new players in the E2F  
828 transcription factor family. *Trends Cell Biol* 19: 111-8
- 829 Li J, Ran C, Li E, Gordon F, Comstock G, Siddiqui H, Cleghorn W, Chen HZ, Kornacker K,  
830 Liu CG, Pandit SK, Khanizadeh M, Weinstein M, Leone G, de Bruin A (2008) Synergistic  
831 function of E2F7 and E2F8 is essential for cell survival and embryonic development. *Dev*  
832 *Cell* 14: 62-75
- 833 Listovsky T, Zor A, Laronne A, Brandeis M (2000) Cdk1 is essential for mammalian  
834 cyclosome/APC regulation. *Exp Cell Res* 255: 184-91
- 835 Liu B, Shats I, Angus SP, Gatz ML, Nevins JR (2013) Interaction of E2F7 transcription  
836 factor with E2F1 and C-terminal-binding protein (CtBP) provides a mechanism for E2F7-  
837 dependent transcription repression. *J Biol Chem* 288: 24581-9
- 838 Maiti B, Li J, de Bruin A, Gordon F, Timmers C, Opavsky R, Patil K, Tuttle J, Cleghorn W,  
839 Leone G (2005) Cloning and characterization of mouse E2F8, a novel mammalian E2F  
840 family member capable of blocking cellular proliferation. *J Biol Chem* 280: 18211-20
- 841 Manning AL, Longworth MS, Dyson NJ (2010) Loss of pRB causes centromere dysfunction  
842 and chromosomal instability. *Genes Dev* 24: 1364-76
- 843 Mavrommati I, Faedda R, Galasso G, Li J, Burdova K, Fischer R, Kessler BM, Carrero ZI,  
844 Guardavaccaro D, Pagano M, D'Angiolella V (2018) beta-TrCP- and Casein Kinase II-  
845 Mediated Degradation of Cyclin F Controls Timely Mitotic Progression. *Cell Rep* 24: 3404-  
846 3412
- 847 McGarry TJ, Kirschner MW (1998) Geminin, an inhibitor of DNA replication, is degraded  
848 during mitosis. *Cell* 93: 1043-53
- 849 Meerbrey KL, Hu G, Kessler JD, Roarty K, Li MZ, Fang JE, Herschkowitz JI, Burrows AE,  
850 Ciccica A, Sun T, Schmitt EM, Bernardi RJ, Fu X, Bland CS, Cooper TA, Schiff R, Rosen  
851 JM, Westbrook TF, Elledge SJ (2011) The pINDUCER lentiviral toolkit for inducible RNA  
852 interference in vitro and in vivo. *Proc Natl Acad Sci U S A* 108: 3665-70
- 853 Meyer HJ, Rape M (2011) Processive ubiquitin chain formation by the anaphase-promoting  
854 complex. *Semin Cell Dev Biol* 22: 544-50



- 855 Murray AW, Desai AB, Salmon ED (1996) Real time observation of anaphase in vitro. *Proc*  
856 *Natl Acad Sci U S A* 93: 12327-32
- 857 Murray AW, Kirschner MW (1989) Cyclin synthesis drives the early embryonic cell cycle.  
858 *Nature* 339: 275-80
- 859 Nguyen H, Gitig DM, Koff A (1999) Cell-free degradation of p27(kip1), a G1 cyclin-  
860 dependent kinase inhibitor, is dependent on CDK2 activity and the proteasome. *Mol Cell Biol*  
861 19: 1190-201
- 862 Nguyen PA, Groen AC, Loose M, Ishihara K, Wuhr M, Field CM, Mitchison TJ (2014)  
863 Spatial organization of cytokinesis signaling reconstituted in a cell-free system. *Science* 346:  
864 244-7
- 865 Noach-Hirsh M, Nevenzal H, Glick Y, Chorni E, Avrahami D, Barbiro-Michaely E, Gerber  
866 D, Tzur A (2015) Integrated Microfluidics for Protein Modification Discovery. *Mol Cell*  
867 *Proteomics* 14: 2824-32
- 868 Orian A, Gonen H, Bercovich B, Fajerman I, Eytan E, Israel A, Mercurio F, Iwai K,  
869 Schwartz AL, Ciechanover A (2000) SCF(beta)(-TrCP) ubiquitin ligase-mediated processing  
870 of NF-kappaB p105 requires phosphorylation of its C-terminus by IkappaB kinase. *EMBO J*  
871 19: 2580-91
- 872 Ouseph MM, Li J, Chen HZ, Pecot T, Wenzel P, Thompson JC, Comstock G, Chokshi V,  
873 Byrne M, Forde B, Chong JL, Huang K, Machiraju R, de Bruin A, Leone G (2012) Atypical  
874 E2F repressors and activators coordinate placental development. *Dev Cell* 22: 849-62
- 875 Pe'er T, Lahmi R, Sharaby Y, Chorni E, Noach M, Vecsler M, Zlotorynski E, Steen H, Steen  
876 JA, Tzur A (2013) Gas2l3, a novel constriction site-associated protein whose regulation is  
877 mediated by the APC/C Cdh1 complex. *PLoS One* 8: e57532
- 878 Pfister K, Pipka JL, Chiang C, Liu Y, Clark RA, Keller R, Skoglund P, Guertin MJ, Hall IM,  
879 Stukenberg PT (2018) Identification of Drivers of Aneuploidy in Breast Tumors. *Cell Rep*  
880 23: 2758-2769
- 881 Pflieger CM, Kirschner MW (2000) The KEN box: an APC recognition signal distinct from  
882 the D box targeted by Cdh1. *Genes Dev* 14: 655-65
- 883 Polager S, Ginsberg D (2008) E2F - at the crossroads of life and death. *Trends Cell Biol* 18:  
884 528-35
- 885 Powers BL, Hall MC (2017) Re-examining the role of Cdc14 phosphatase in reversal of Cdk  
886 phosphorylation during mitotic exit. *J Cell Sci* 130: 2673-2681
- 887 Rape M, Kirschner MW (2004) Autonomous regulation of the anaphase-promoting complex  
888 couples mitosis to S-phase entry. *Nature* 432: 588-95
- 889 Rape M, Reddy SK, Kirschner MW (2006) The processivity of multiubiquitination by the  
890 APC determines the order of substrate degradation. *Cell* 124: 89-103
- 891 Silverman JS, Skaar JR, Pagano M (2012) SCF ubiquitin ligases in the maintenance of  
892 genome stability. *Trends Biochem Sci* 37: 66-73
- 893 Singh SA, Winter D, Kirchner M, Chauhan R, Ahmed S, Ozlu N, Tzur A, Steen JA, Steen H  
894 (2014) Co-regulation proteomics reveals substrates and mechanisms of APC/C-dependent  
895 degradation. *EMBO J* 33: 385-99
- 896 Sudakin V, Ganoth D, Dahan A, Heller H, Hershko J, Luca FC, Ruderman JV, Hershko A  
897 (1995) The cyclosome, a large complex containing cyclin-selective ubiquitin ligase activity,  
898 targets cyclins for destruction at the end of mitosis. *Mol Biol Cell* 6: 185-97
- 899 Telley IA, Gaspar I, Ephrussi A, Surrey T (2012) Aster migration determines the length scale  
900 of nuclear separation in the Drosophila syncytial embryo. *J Cell Biol* 197: 887-95
- 901 Thurlings I, de Bruin A (2016) E2F Transcription Factors Control the Roller Coaster Ride of  
902 Cell Cycle Gene Expression. *Methods Mol Biol* 1342: 71-88
- 903 Vecsler M, Lazar I, Tzur A (2013) Using standard optical flow cytometry for synchronizing  
904 proliferating cells in the G1 phase. *PLoS One* 8: e83935

905 Watson ER, Brown NG, Peters JM, Stark H, Schulman BA (2019) Posing the APC/C E3  
906 Ubiquitin Ligase to Orchestrate Cell Division. *Trends Cell Biol* 29: 117-134  
907 Wheatley SP, Hinchcliffe EH, Glotzer M, Hyman AA, Sluder G, Wang Y (1997) CDK1  
908 inactivation regulates anaphase spindle dynamics and cytokinesis in vivo. *J Cell Biol* 138:  
909 385-93  
910 Wu T, Merbl Y, Huo Y, Gallop JL, Tzur A, Kirschner MW (2010) UBE2S drives elongation  
911 of K11-linked ubiquitin chains by the anaphase-promoting complex. *Proc Natl Acad Sci U S*  
912 *A* 107: 1355-60  
913 Wurzenberger C, Gerlich DW (2011) Phosphatases: providing safe passage through mitotic  
914 exit. *Nat Rev Mol Cell Biol* 12: 469-82  
915 Yaron A, Hatzubai A, Davis M, Lavon I, Amit S, Manning AM, Andersen JS, Mann M,  
916 Mercurio F, Ben-Neriah Y (1998) Identification of the receptor component of the  
917 IkappaBalpha-ubiquitin ligase. *Nature* 396: 590-4  
918 Zachariae W, Schwab M, Nasmyth K, Seufert W (1998) Control of cyclin ubiquitination by  
919 CDK-regulated binding of Hct1 to the anaphase promoting complex. *Science* 282: 1721-4  
920 Zalmas LP, Zhao X, Graham AL, Fisher R, Reilly C, Coutts AS, La Thangue NB (2008)  
921 DNA-damage response control of E2F7 and E2F8. *EMBO Rep* 9: 252-9  
922 Zou H, McGarry TJ, Bernal T, Kirschner MW (1999) Identification of a vertebrate sister-  
923 chromatid separation inhibitor involved in transformation and tumorigenesis. *Science* 285:  
924 418-22  
925 Zur A, Brandeis M (2001) Securin degradation is mediated by fzy and fzr, and is required for  
926 complete chromatid separation but not for cytokinesis. *EMBO J* 20: 792-801  
927 Zur A, Brandeis M (2002) Timing of APC/C substrate degradation is determined by fzy/fzr  
928 specificity of destruction boxes. *EMBO J* 21: 4500-10  
929  
930  
931  
932  
933  
934  
935  
936  
937  
938  
939  
940  
941  
942



943 **Figures**

944

945

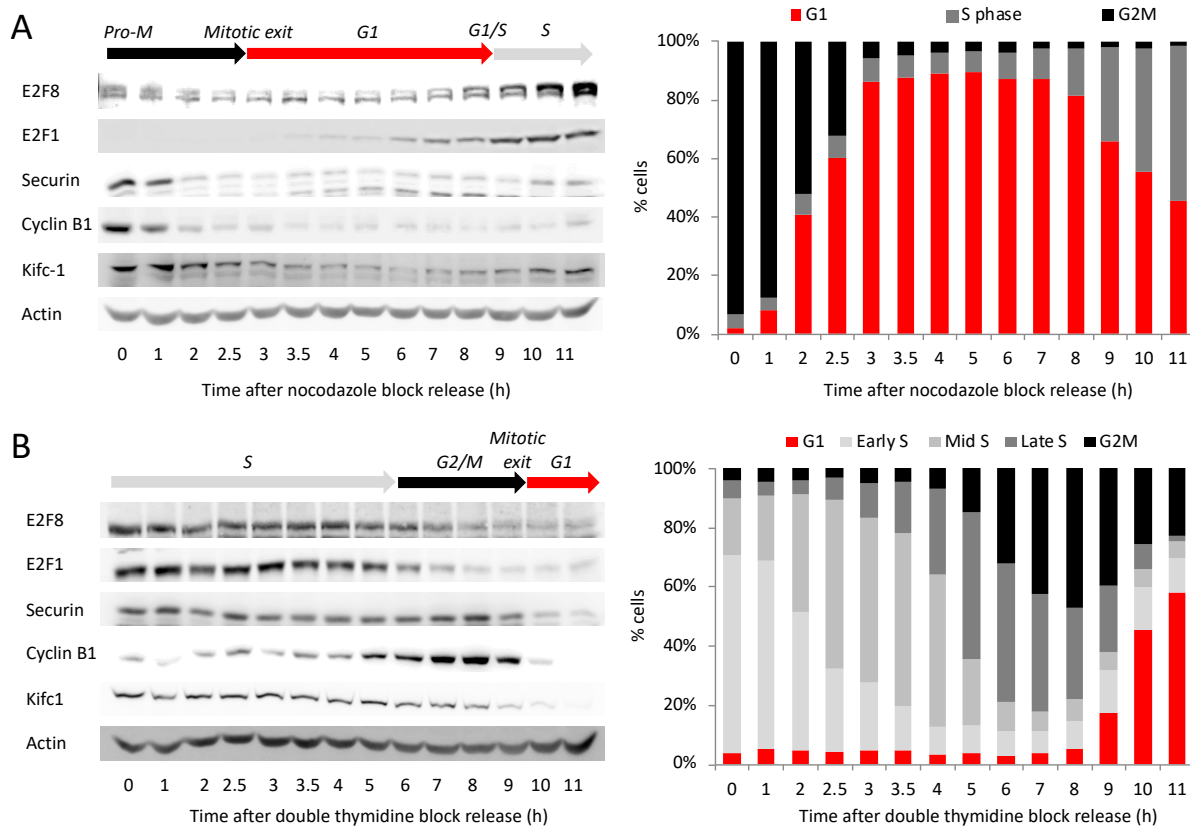

946

947

948

949

950

951

952

953

954

**Figure 1: Temporal dynamics of E2F8 across the cell cycle.** Western blot analyses of E2F8, E2F1 and canonical APC/C targets in synchronous S3 cells (DNA distributions are shown). Synchronization methods: release from thymidine-nocodazole block (A) and release from double thymidine block (B).

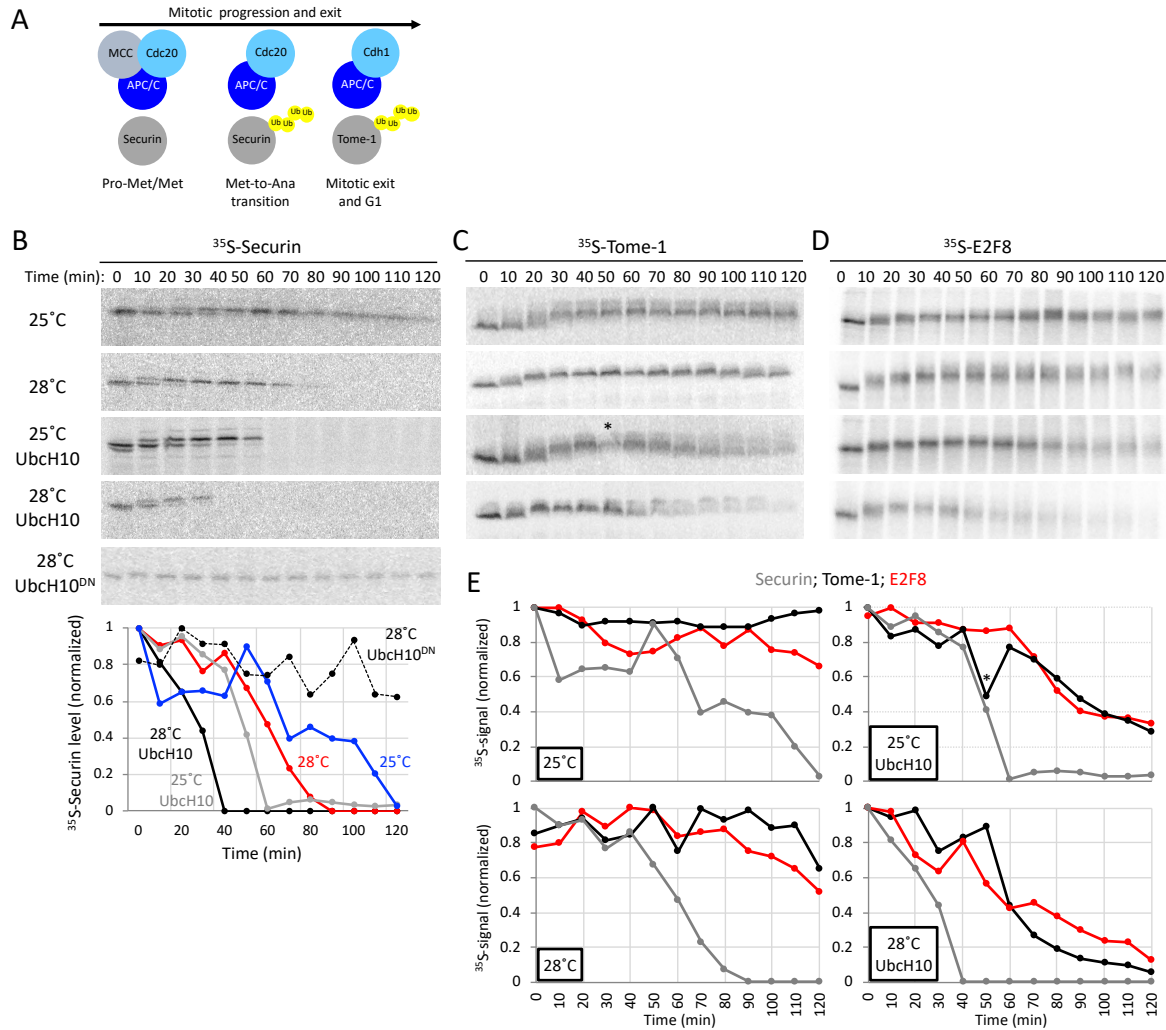

955  
 956 **Figure 2: Temporal proteolysis of E2F8 in 'dynamic' mitotic extracts progressing from pro-metaphase to G1.**  
 957 Schematic of molecular milestones along mitosis. At pro-metaphase (Pro-Met) and metaphase (Met), the mitotic  
 958 checkpoint complex (MCC) prevents from APC/C<sup>Cdc20</sup> to ubiquitinate Securin. MCC removal induces Securin and Cyclin B1  
 959 degradation and the metaphase-to-anaphase (Met-to-Ana) transition. The drop in Cyclin B1 levels induces i) the switch  
 960 from APC/C<sup>Cdc20</sup> to APC/C<sup>Cdh1</sup> activity; ii) the degradation of Tome-1 and other Cdh1-sepcific targets; and iii) mitotic exit into  
 961 G1. **(B - E)** Cell extracts were made from thymidine/nocodazole-arrested S3 cells. MCC removal and mitotic exit occur  
 962 spontaneously in these extracts in a temperature-controlled manner or by adding recombinant UbcH10. The addition of  
 963 dominant negative UbcH10 (UbcH10<sup>DN</sup>) blocks mitotic progression and exit (B). Temporal proteolysis and  
 964 (de)phosphorylation-induced electrophoretic mobility shifts of Securin and Tome-1 are shown (B and C). At optimal  
 965 reaction condition (UbcH10; 28°C), extracts eventually reach a G1-like state in which APC/C<sup>Cdh1</sup> is active (C). Time-  
 966 dependent degradations of Securin (B), Tome-1 (C) and E2F8 (D) [<sup>35</sup>S-labeled *in vitro* translated (IVT) products] were  
 967 assayed by SDS-PAGE and autoradiography. Source data (B-D) and quantification (E) are shown (\* marks a deformed band).  
 968 Temporal proteolysis and electrophoretic mobility shifts of E2F8 and Tome-1 are highly similar.

969  
970  
971  
972  
973  
974  
975  
976  
977  
978  
979  
980  
981  
982  
983  
984  
985  
986  
987  
988  
989  
990  
991  
992  
993  
994  
995  
996  
997  
998  
999  
1000  
1001  
1002  
1003  
1004  
1005  
1006  
1007  
1008  
1009  
1010  
1011  
1012  
1013  
1014  
1015  
1016  
1017  
1018  
1019

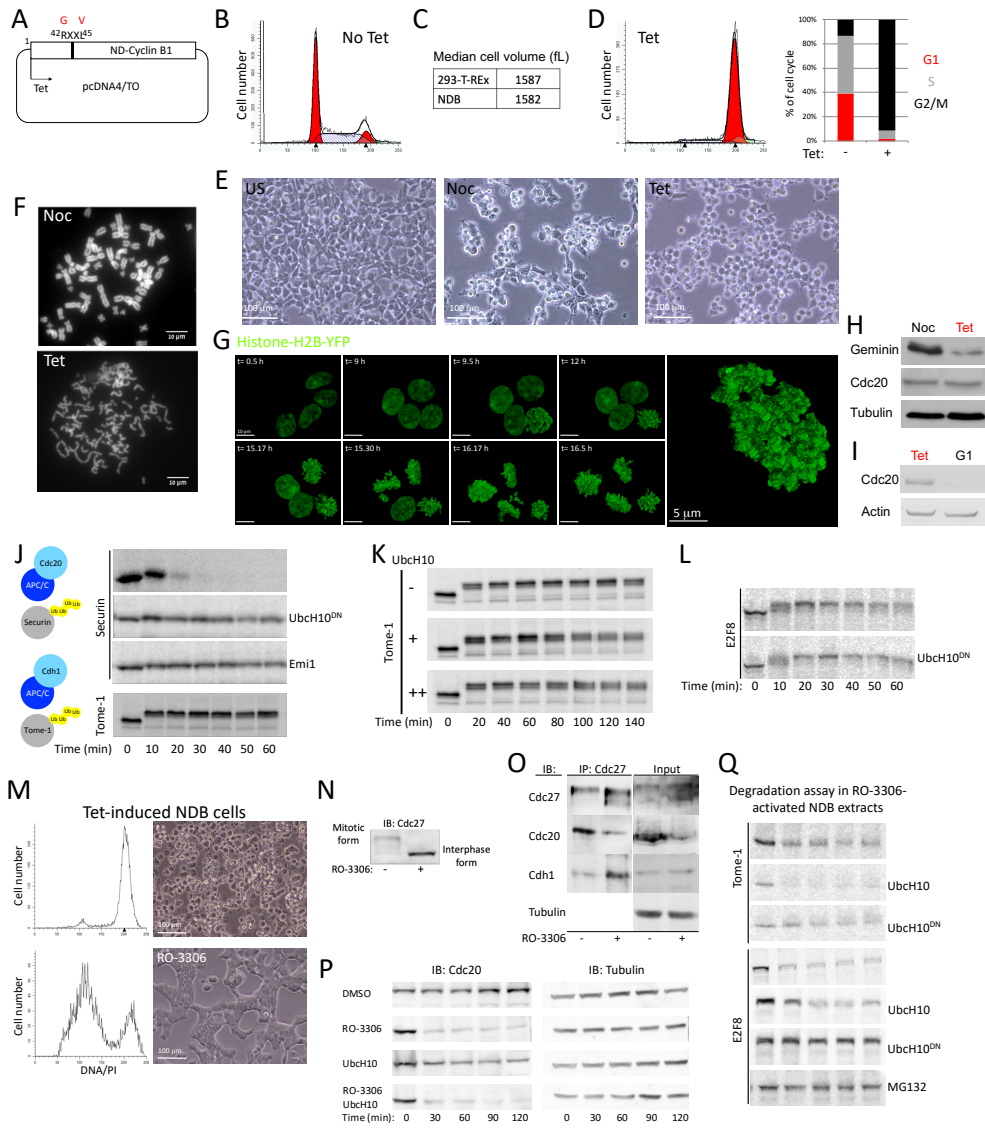

**Figure 3: E2F8 is stable in 'static' APC/C<sup>Cdc20</sup>-active extracts.** (A) Human Cyclin B1 in which Arg 42 and Leu 45 are substituted with Gly and Val is non-degradable (ND). A colony of 293-T-REx cells stably expressing ND-Cyclin B1 (NDB) under tetracycline (tet)-regulated CMV promoter was generated (i.e., NDB cells). (B) DNA distribution of asynchronous NDB cell population. (C) Median cell size (fL: femtoliter) of NDB cells vs. parental 293-T-REx cells. (D) DNA distribution of NDB cells following 22 h treatment with tet. Cell cycle phase distributions of NDB cells pre- and post-induction with tet are shown. (E) A panel of light phase images of NDB cells pre- and post- incubation with Nocodazole (Noc) or tet. (F) Noc- or tet-treated NDB cells were harvested for chromosome spreads. Representative fluorescent images of DAPI stained chromosomes are shown. (G) An image series of live NDB cells stably expressing Histone-H2B following tet treatment. A higher resolution image of a live, tet-treated NDB cell with typical disorganized chromatids is shown on the right. (H) Noc- or tet-treated NDB cells were harvested for Western blotting. (I) NDB cells showing the lowest 10% forward scatter width (FSC-W) signal were sorted. These G1 cells, as well as tet-treated NDB cells, were harvested for Western blotting with the depicted antibodies. (J) Mitotic cell extracts were generated from tet-induced NDB cells. Degradation of Securin and Tome-1 (<sup>35</sup>S-labeled IVT products) was assayed in extracts supplemented with mock, Ubch10<sup>DN</sup>, or APC/C inhibitor Emi1 (C-terminal fragment; recombinant). Time-dependent degradation was assayed by SDS-PAGE and autoradiography. (K) Mitotic NDB extracts were supplemented with increasing doses of Ubch10. Degradation and electrophoretic mobility-shift of Tome-1 was examined. (L) Degradation assay of E2F8 (<sup>35</sup>S-labeled IVT products) in mitotic NDB extracts supplemented with mock or Ubch10<sup>DN</sup>. (M-P) Tet-induced NDB cells/extracts can exit mitosis into a G1-like state by blocking Cdk1 activity. (M-N) DNA distributions, light phase images (M), and immunoblot (IB) (N) of tet-induced NDB cells pre- and post-incubation with RO-3306 (135 min). The mitotic vs. G1 electrophoretic mobility-shift of Cdc27 is shown. (O) Mitotic extracts were generated from tet-induced NDB cells. Coimmunoprecipitation (IP) of Cdc27 was performed pre- and post-treatment with RO-3306 (30 min). (P) Time-dependent dynamics of endogenous Cdc20 in mitotic NDB extracts following incubation with DMSO, RO-3306 and/or Ubch10. Cdc20 levels were detected by Western blotting. Loading control (Tubulin) is also shown. (Q) Time-dependent degradation of Tome-1 and E2F8 (<sup>35</sup>S-labeled IVT products) in NDB mitotic extracts pre-activated with RO-3306 (15 min). Reactions were mock treated or supplemented with Ubch10, Ubch10<sup>DN</sup>, or MG132. E2F8 and Tome-1 are stable in APC/C<sup>Cdc20</sup>-active NDB extracts. Both proteins are degraded in extracts where APC/C<sup>Cdh1</sup> is active.

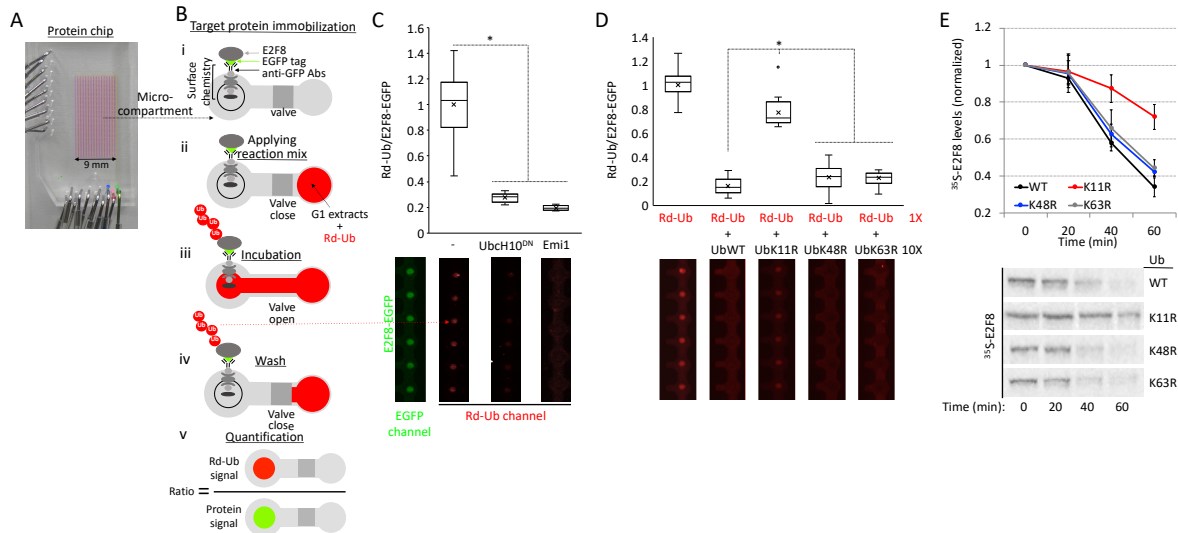

1020  
1021

1022

1023

1024

1025

1026

1027

1028

1029

1030

1031

1032

1033

1034

1035

1036

1037

1038

1039

1040

1041

1042

1043

1044

1045

1046

1047

1048

1049

1050

1051

1052

1053

1054

1055

1056

**Figure 4: Ubiquitination of E2F8 by APC/C<sup>dh1</sup> is primarily via K11-linked ubiquitin chains.** (A) An image of an integrated microfluidic platform comprising microcompartments isolated by pneumatic valves. (B) Each microcompartment has two chambers. Fresh E2F8-EGFP IVT product, was applied to the chip and immobilized to the ‘Protein chamber’ via anti-GFP antibodies (Abs) and a designated surface chemistry (i). Next, G1 extracts supplemented with Rhodamine-coupled Ubiquitin (Rd-Ub) were applied to the second chamber (ii). The opening of the valve allows reaction mix to diffuse into protein chambers, allowing ubiquitination of the immobilized substrate (iii). After 10 min incubation, all protein chambers are washed (iv). Rd-Ub moieties attached to E2F8-EGFP at the protein chamber are quantified by a fluorescence imaging. Rd-Ub signal in each protein chamber is normalized to E2F8-EGFP levels, *i.e.*, ‘Protein signal’ (v). (C) *APC/C<sup>dh1</sup>-mediated ubiquitination of E2F8 on-chip.* E2F8-EGFP was expressed in reticulocyte lysate, deposited on the chip surface, and incubated with G1 extracts supplemented with either mock, UbCH10<sup>DN</sup> or Emi1. Normalized Rd-Ub signals were calculated from 20 microcompartments (mean [X], median [–], and 4 quantiles (box and whiskers) are indicated; \**p* value < 0.001). Array sections showing ‘raw’ Rd-Ub signals of six microreactions for each of the three conditions are shown (red dots). A representative image of immobilized E2F8-EGFP is also shown (green dots). (D) Ubiquitination of E2F8-EGFP was assayed in the presence of G1 extracts, Rd-Ub, and excess of unlabeled WT or mutant Ubiquitin in which Lys 11 (UbK11R), Lys 48 (UbK48R), or Lys (UbK63R) were substituted with Arg. Plots average 18 microreactions. Array sections showing ‘raw’ Rd-Ub signals are depicted. (E) Degradation of <sup>35</sup>S-labeled E2F8 (IVT product) was assayed in G1 extracts supplemented with WT or mutant Ubiquitin. Time-dependent degradation was assayed by SDS-PAGE and autoradiography. Mean and SE values are plotted (*n* = 3). <sup>35</sup>S-E2F8 signals are normalized to *t* = 0. A set of source data is shown.

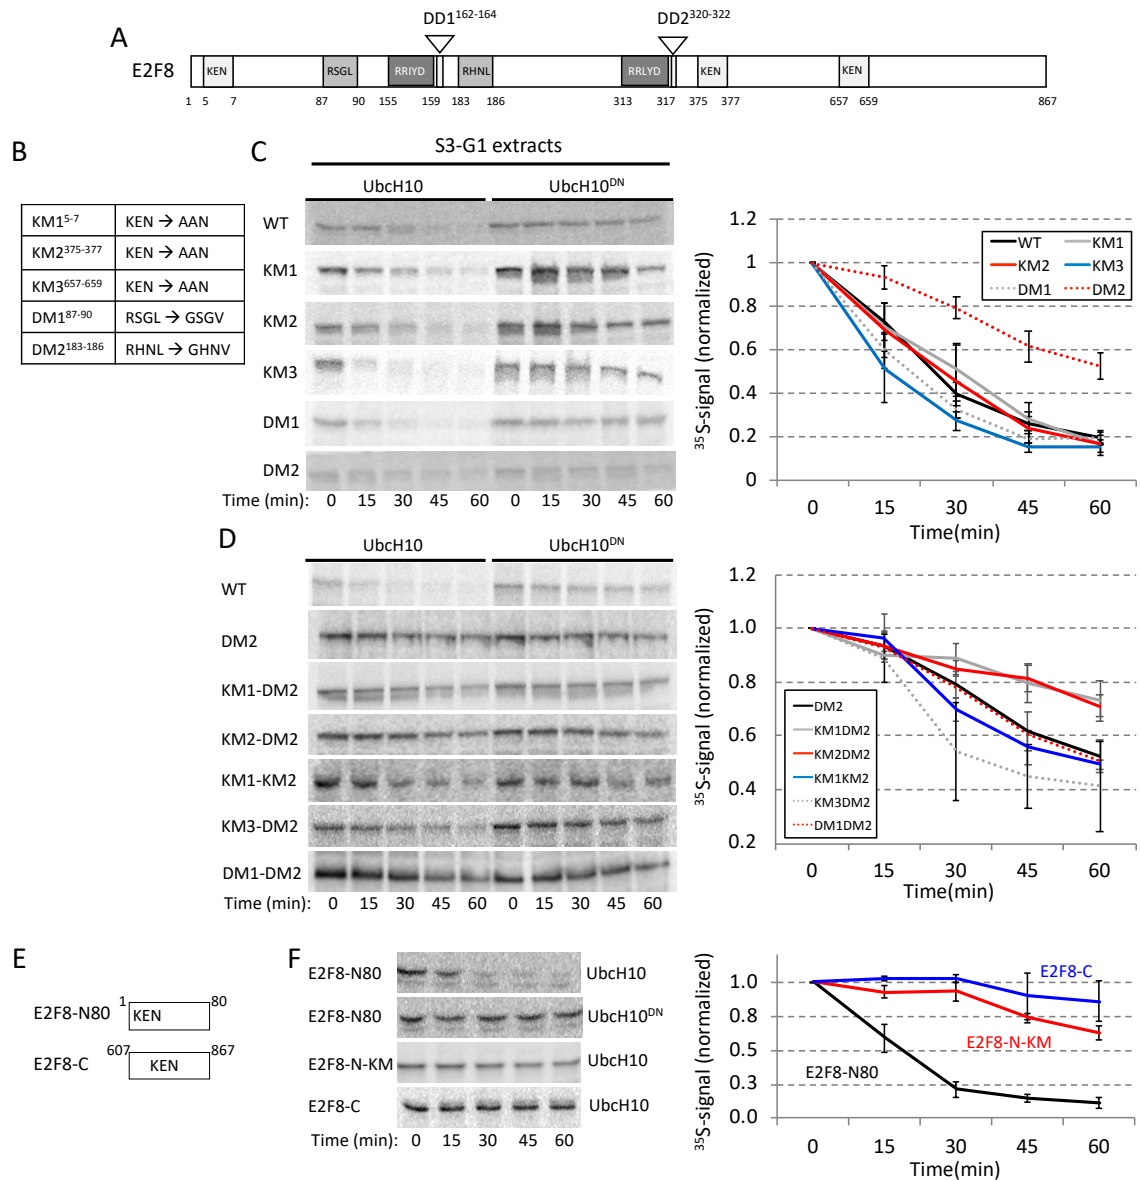

1057  
1058  
1059  
1060  
1061  
1062  
1063  
1064  
1065  
1066  
1067

**Figure 5: Multiple functional motifs coordinate E2F8 proteolysis in G1.** (A) Schematics of human E2F8. KEN and RXXL motifs are shown alongside the conserved DNA-binding (RRXYD)- and dimerization (DD1, DD2) domains. (B) A list of E2F8 mutant variants generated by site-directed mutagenesis. Amino acid substitutions are indicated for each of the five KEN/RXXL motifs. KM1/2/3: KEN mutant 1/2/3; DM1/2: Destruction-box mutant 1/2. (C) Degradation of <sup>35</sup>S-labeled E2F8 variants (IVT products) was tested in G1 extracts supplemented with UbcH10 or UbcH10<sup>DN</sup>. Time-dependent degradation was assayed by SDS-PAGE and autoradiography. Representative raw data and quantifications are shown. Mean E2F8 levels (<sup>35</sup>S signals) normalized to max signal at  $t = 0$  are shown ( $n = 3-4$ ). Bars represent SE (D). E2F8 double mutants were analyzed as described in C. (E) Schematics of N- and C-terminal fragments of E2F8 (E2F8-N80/C) carrying a single KEN motif. (F) Time-dependent degradation of E2F8 fragments (see details in C). Overall, the data suggest that RXXL<sup>183</sup>, KEN<sup>5</sup>, and KEN<sup>375</sup>, but not RXXL<sup>85</sup> and KEN<sup>657</sup>, contribute cooperatively to E2F8 degradation by APC/C<sup>dhl1</sup>.



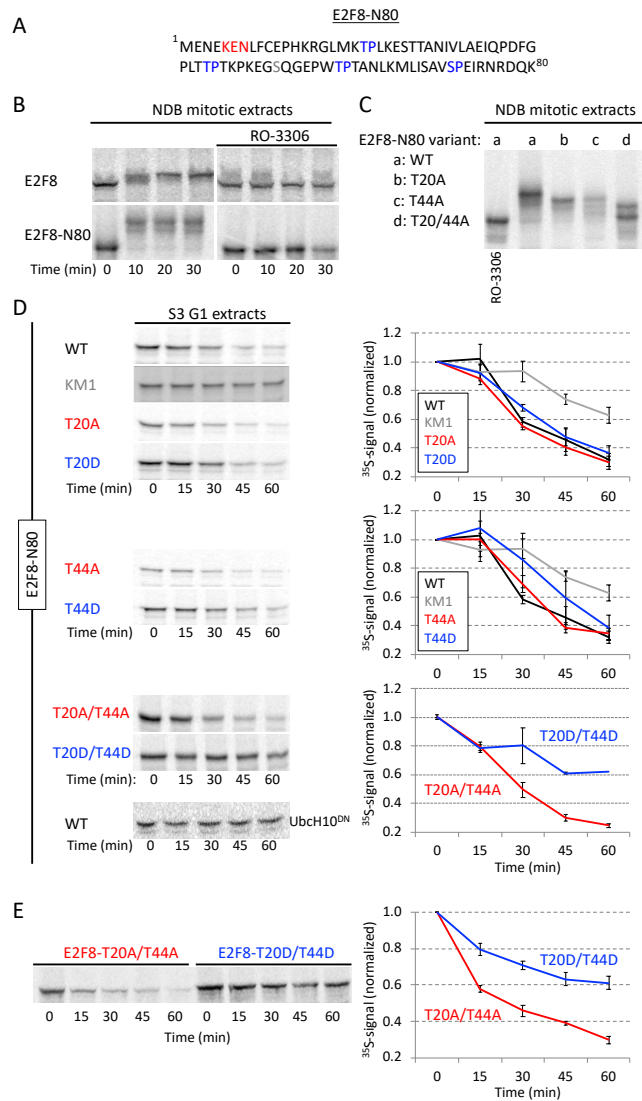

1068  
 1069  
 1070  
 1071  
 1072  
 1073  
 1074  
 1075  
 1076  
 1077  
 1078  
 1079  
 1080  
 1081  
 1082  
 1083  
 1084

**Figure 6: Phosphomimetic Cdk1 sites stabilized E2F8 in G1 extracts.** (A) E2F8 N-terminal fragment of 80 amino acids (E2F8-N80). KEN box and 4 canonical Cdk1 consensus phosphorylation sites are colored. (B) Time-dependent electrophoretic mobility shift of full-length and E2F8-N80 (<sup>35</sup>S-labeled IVT products) in NDB mitotic extracts supplemented with mock or the Cdk1 inhibitor RO-3306. (C) Thr (T)20 and/or T44 of E2F8-N80 were substituted with Ala (A). Mobility shifts of WT vs. mutant E2F8-N80 variants are shown. (D) Time-dependent degradation in G1 extracts of E2F8-N80 and the following variants: KEN box mutant (KM1), single/double phosphomimetic mutants [T-to-Asp (D)], and single/double phospho-dead mutants (T-to-Ala). (E) Time-dependent degradation of full-length E2F8 carrying double phosphomimetic or double phospho-dead mutations. (B-E) Protein degradations and electrophoretic mobility-shifts were assayed by SDS-PAGE and autoradiography. A set of source data is shown. Mean and SE calculated from three degradation assays are plotted.

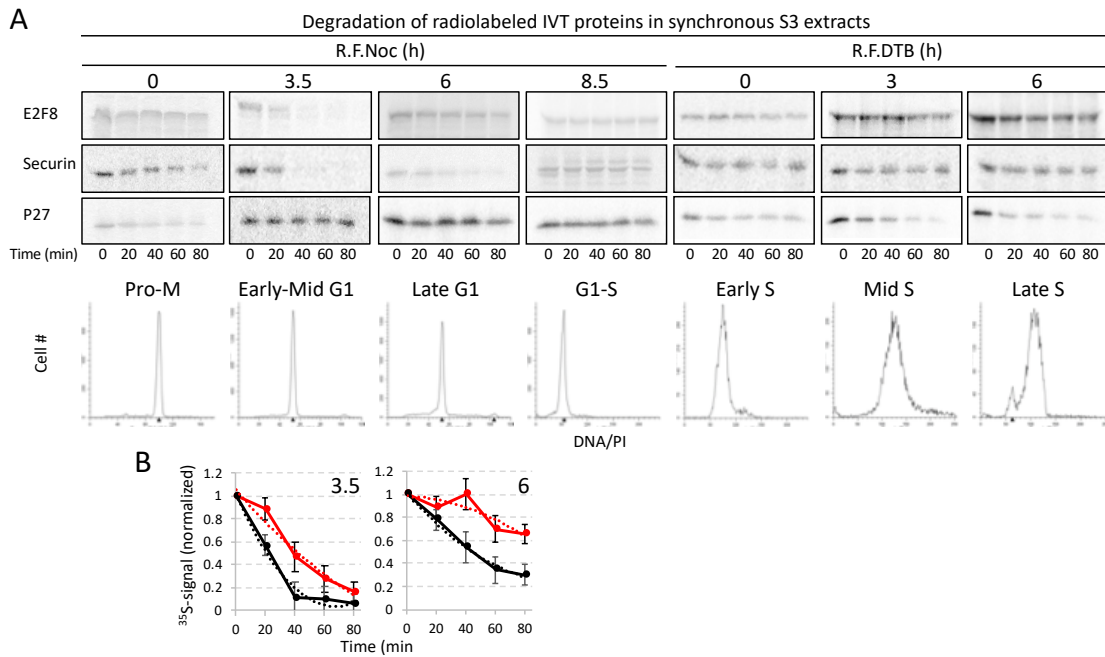

**Figure 7: Temporal proteolysis of E2F8 across the cell cycle.** (A) Degradations of <sup>35</sup>S-labeled E2F8, Securin and p27 (IVT products) were tested in seven cell extracts generated from synchronous S3 cells at seven points across the cell cycle (R.F.Noc: Release from a thymidine-nocodazole block; R.F.DTB: Release from a double thymidine block). DNA distributions are shown. Extracts were supplemented only with ubiquitin and energy-regeneration mix. Time-dependent degradation was assayed by SDS-PAGE and autoradiography. A set of source data is shown. (B) Average, SE and polynomial fit (dotted line) calculated from three degradation assays of E2F8 and Securin in early-mid- and late-G1 extracts. <sup>35</sup>S signals were normalized to  $t_0$ . The differential degradation capacity for E2F8 vs. Securin in late G1 extracts is demonstrated.

1086  
1087  
1088  
1089  
1090  
1091  
1092  
1093  
1094  
1095  
1096  
1097  
1098  
1099  
1100  
1101  
1102  
1103  
1104  
1105  
1106  
1107  
1108  
1109  
1110  
1111  
1112  
1113  
1114  
1115  
1116  
1117

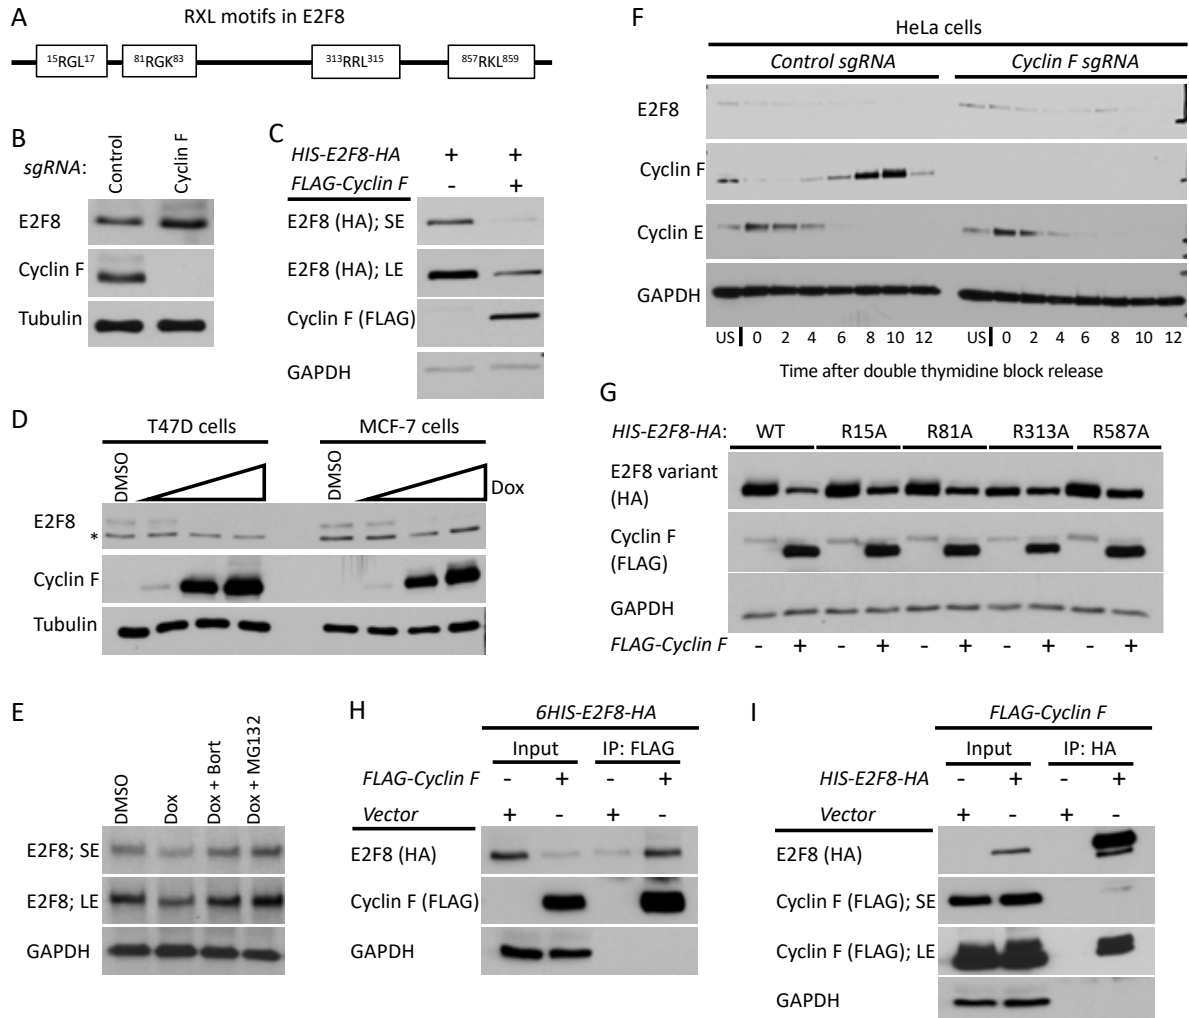

1118  
 1119  
 1120  
 1121  
 1122  
 1123  
 1124  
 1125  
 1126  
 1127  
 1128  
 1129  
 1130  
 1131  
 1132  
 1133

**Figure 8: Cyclin F mediates the degradation of E2F8 in G2-phase.** (A) Schematic depiction of the RxL motifs in E2F8. (B) The abundance of E2F8 in control Cyclin F KO HeLa cells was analyzed by western blot. (C) HEK293T cells were transiently transfected with HIS-E2F8-HA with and without FLAG-Cyclin F. Cells were analyzed by western blot 48 hours post transfection. SE: short exposure; LE: long exposure. (D) MCF7 and T47D were engineered to express doxycycline (Dox) inducible Cyclin F. Cells were treated with doxycycline at increasing concentrations for 48 hours and then endogenous E2F8 was analyzed by western blot. (E) MCF7 cells were treated with doxycycline to induce expression of Cyclin F. Eight hours prior to harvesting for western blot, cells were treated 8h with either of two proteasome inhibitors, MG132 and bortezomib. Endogenous E2F8 was analyzed by western blot. (F) Control and Cyclin F KO HeLa cells were synchronized at the G1-S boundary by a double thymidine block. Following release from the second thymidine block, samples were collected for western blot analysis at the indicated time points. (G) HEK293T cells were transfected with wild-type or mutant versions of HIS-E2F8-HA harboring alanine substitutions at the indicated RxL motifs shown in (A). Their response to ectopic co-expression was analyzed by western blot 48 hours after transfection. (H and I) HIS-E2F8-HA and FLAG-Cyclin F were co-transfected into HEK293T cells. Cell lysates were subjected to co-IP with either anti-HA or anti-FLAG antibodies.



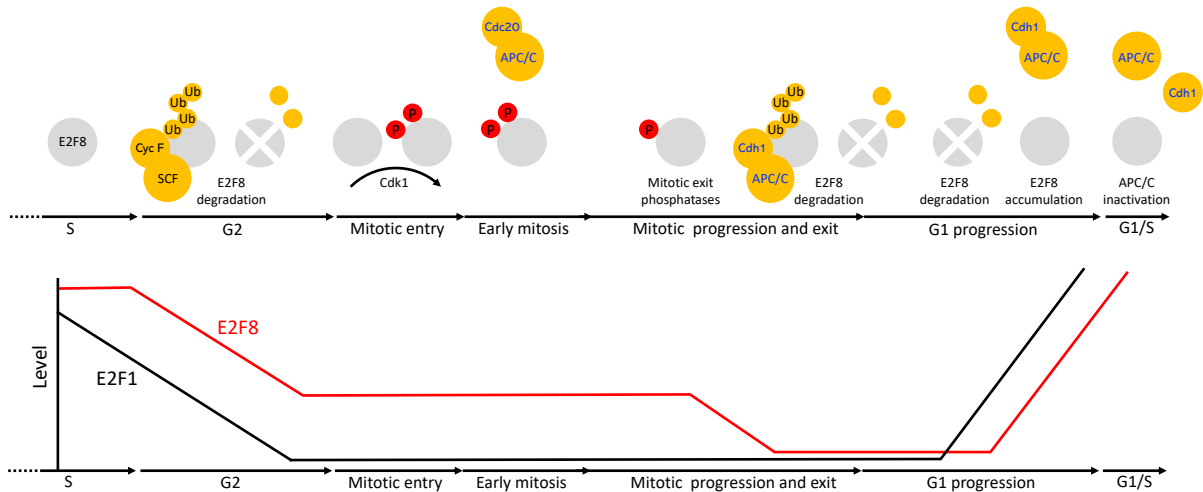

1134

1135

1136

1137

1138

1139

1140

1141

1142

1143

1144

1145

1146

1147

1148

1149

1150

1151

1152

1153

**Figure 9: Multiple mechanisms coordinate the dynamics of E2F8 in cycling mammalian cells. (A)** At the transcriptional level, E2F8 is primarily regulated by E2F1 via a negative feedback mechanism. Post-translationally, E2F8 is controlled by temporal proteolysis orchestrated by multiple pathways. E2F8 peaks in S-phase. During G2-phase, E2F8 protein is downregulated by SCF<sup>Cyclin F</sup> activity. Although low-levelled, E2F8 remains stable during early mitosis while APC/C<sup>Cdc20</sup> is active. E2F8 is phosphorylated in mitosis by Cdk1. This phosphorylation has a stabilizing effect on the protein. During mitotic exit, Cdk1 is inactivated and both E2F8 and Cdh1 are dephosphorylated. This dual molecular switch initiates both the assembly of APC/C<sup>Cdh1</sup> and its ability to ubiquitinate E2F8. The levels of E2F8 remain minimal through G1 as long as APC/C<sup>Cdh1</sup> is fully active. During late G1, APC/C<sup>Cdh1</sup> activity weakens by an autonomous mechanism. E2F8 enhanced sensitivity to suboptimal APC/C<sup>Cdh1</sup> activity effectively stabilizes the protein while other APC/C targets are still degraded. Because E2F1 is already present, the negative feedback circuitry between E2F1 and E2F8 can be formed already in G1 in ensuring a safe transition into S-phase.

1154  
1155  
1156  
1157  
1158  
1159  
1160  
1161  
1162  
1163  
1164  
1165  
1166  
1167  
1168  
1169  
1170  
1171  
1172  
1173

**Supplementary Information**

**For**

Cell cycle oscillators underlying orderly proteolysis of E2F8

**Author list and affiliation:**

Danit Wasserman<sup>1</sup>; Sapir Nachum<sup>1</sup>; Meital Cohen<sup>1</sup>; Taylor P Enrico<sup>2</sup>; Meirav Noach-Hirsh<sup>1</sup>;  
Jasmin Parasol<sup>1</sup>, Sarit Zomer-Polak<sup>1</sup>; Naomi Auerbach<sup>1</sup> Evelin Sheinberger Chorni<sup>1</sup>; Hadas  
Nevenzal<sup>1</sup>; Nofar Levi-Dadon<sup>1</sup>; Xianxi Wang<sup>2</sup>; Roxane Lahmi<sup>1</sup>; Efrat Michaely<sup>1</sup>; Doron  
Gerber<sup>1</sup>; Michael J. Emanuele<sup>2</sup>; Amit Tzur<sup>1,3</sup>

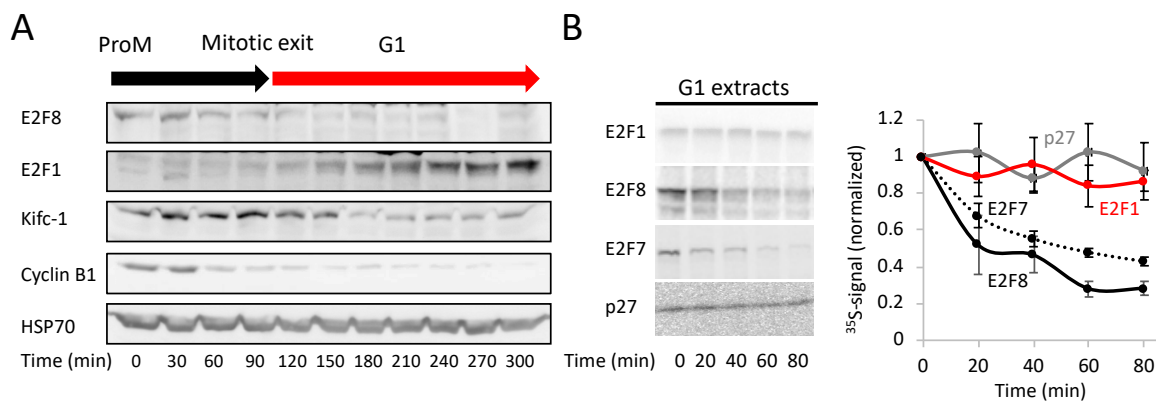

1175  
 1176  
 1177  
 1178  
 1179  
 1180  
 1181  
 1182  
 1183  
 1184  
 1185  
 1186  
 1187  
 1188  
 1189

**Figure S2: E2F1 is stable in APC/C<sup>Cdh1</sup>-active G1 extracts.** (A) Western blot analyses of E2F1, E2F8, Cyclin B1, Kifc-1 (APC/C<sup>Cdh1</sup> targets) and HSP70 (loading control) in synchronous S3 cells released from a thymidine-nocodazole block into G1. Samples were harvested in 30 min intervals. (B) Time-dependent degradations of <sup>35</sup>S-labeled E2F1, E2F7, E2F8 and p27 (IVT products) in G1 extracts were assayed by SDS-PAGE and autoradiography. A set of source data and quantification of three experiments are shown (mean and SE values are plotted). In contrast to E2F8 and E2F7, E2F1 is stable in G1 extracts, like the SCF<sup>Skp2</sup> target p27 (negative control).

1190 ***Degradation of E2F8 in G1 extracts is dependent on intact dimerization domains***

1191 E2F8-EGFP, but not EGFP-E2F8, is degraded in G1 extracts in a manner similar to untagged

1192 E2F8 (**Fig. S2**). At some point during this study, we asked to complement our findings with *in*

1193 *vivo* quantification of fluorescently tagged E2F8 in live cells. Multiple attempts and

1194 strategies to generate stable cell lines with a constitutive (not inducible) expression of E2F8-

1195 EGFP failed. In addition, extensive efforts to knock in Venus (YFP) into an endogenous E2F8

1196 locus also failed. Reasoning that fluorescently tagged E2F8, all the more so when

1197 overexpressed, might be cytotoxic, and focusing on E2F8 dynamics rather than function, we

1198 generated E2F8 lacking DNA binding domains (DBD1/2) with the assumption that

1199 dysfunctional E2F8-EGFP might be inert *in vivo*. Because E2F8 functions as a homo/hetero-

1200 dimer, we also deleted its two dimerization domains (DD1/2) to minimize potential

1201 dominant-negative effect of the modified E2F8 in cells (**Fig. 5A and Fig. S3A**). Mutations

1202 were strategized based on the literature (Liu, Shats et al., 2013, Zalmas, Zhao et al., 2008).

1203 Conceptually, this experimental set up is valid only if the temporal proteolysis of the

1204 modified E2F8 variants is unchanged. To test that, we first assayed the proteolysis of the

1205 quadruple DBD/DD E2F8 mutant in G1 extracts. Surprisingly, this mutation nearly blocked

1206 E2F8 degradation (**Fig. S3B**). It was the DD mutations, rather than the DBD mutations, that

1207 contributed most to this molecular phenotype. In view of these results, we decided to

1208 abandon this line of research. The data, however, have implications on the structure-to-

1209 function relationship of E2F8 with relevance to past and future research of atypical E2Fs.

1210

1211

1212

1213

1214

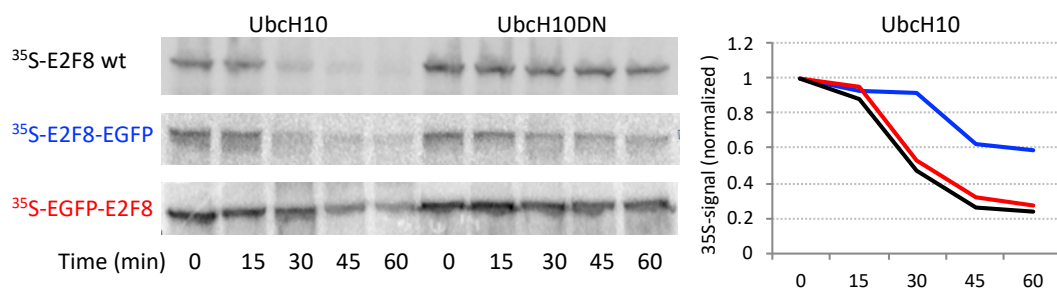

1215  
1216  
1217  
1218  
1219  
1220

**Figure S2: Proteolysis of EGFP-tagged E2F8 in G1 extracts.** E2F8 was tagged with EGFP on either N- or C terminus. <sup>35</sup>S-labeled IVT product of tagged and untagged E2F8 were made, and their time-dependent degradations in G1 extracts were assayed by SDS-PAGE and autoradiography. Quantification of source data is plotted using matching colors.

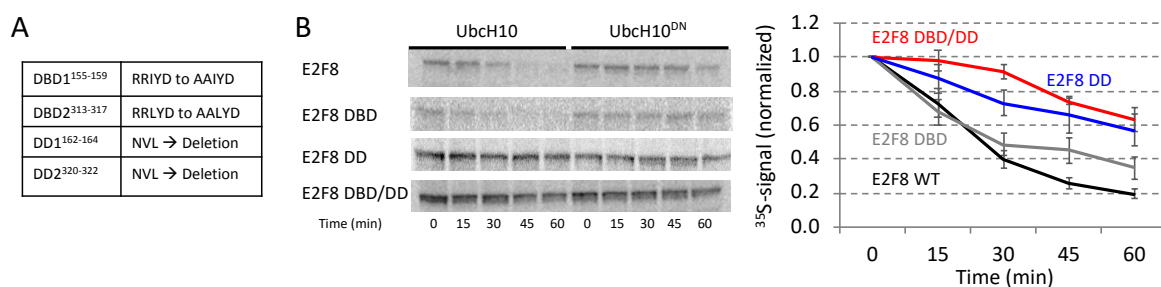

1221  
1222  
1223  
1224  
1225  
1226  
1227  
1228  
1229  
1230  
1231  
1232  
1233  
1234  
1235

**Figure S3. Degradation of E2F8 in G1 extracts is dependent on intact dimerization domains.** (A) E2F8 variants with mutated DNA-binding domains (DBD1/DBD2) or dimerization domains (DD1/DD2) or both, were generated using point mutations or deletion. (B) Degradation of <sup>35</sup>S-labeled E2F8 variants (IVT products) was tested in G1 extracts supplemented with WT or dominant negative UbcH10 (UbcH10<sup>DN</sup>). Time-dependent degradation was assayed by SDS-PAGE and autoradiography. Representative raw data and quantifications are shown. Mean E2F8 levels (<sup>35</sup>S signals) normalized to max signal at *t* = 0 are shown (*n* = 3-4). Bars represent SE. An unexpected, albeit profound, dependency of E2F8 proteolysis on intact dimerization domains, but not the adjacent DNA-binding domains, is evident.

1236 **Supplementary Tables**

1237

1238

1239

**Table 1: List of DNA oligos used for cloning and mutagenesis**

| No. | Plasmid                             | F/R* | Oligo sequence                                                       | Description                                                                                                                              |
|-----|-------------------------------------|------|----------------------------------------------------------------------|------------------------------------------------------------------------------------------------------------------------------------------|
| 1   | pcDNA4/TO-Cyclin B1-DM              | F    | GACTGGATCCATGGCGCTCCGAGTACCAG                                        | For cloning a D-box mutant full-length human Cyclin B1 into a Tet-induced vector.                                                        |
| 2   |                                     | R    | GACTCTCGAGTTACACCTTTGCCACAGCCTT                                      |                                                                                                                                          |
| 3   | pCS2-FA-E2F8-EGFP                   | F    | GCATGGCCGGCCACCATGGAGAACGAAAA GGAAA                                  | For C-terminal tagging E2F8 with EGFP in pCS2-FA vector.                                                                                 |
| 4   |                                     | R    | GCATACCGGTGTATGGACATCCTCTGTTGAG                                      |                                                                                                                                          |
| 5   | pCS2-His-E2F8-N80-EGFP              | F    | GCATGGCCGGCCACCATGGAGAACGAAAA GGAAA                                  | For cloning the ORF of E2F8 N-terminus (amino acid 1-80) in frame with His (N-terminal) and EGFP (C-terminal) tags in pCS2-FA vector.    |
| 6   |                                     | R    | GCATACCGGTGGATCCCATTCTGATCTCTGT TCGCGATC                             |                                                                                                                                          |
| 7   | pCS2-His-E2F8-C-EGFP                | F    | GCATGGCCGGCCACCATGCTCGAGGACAGT GGTTCC                                | For cloning the ORF of E2F8 C-terminus (amino acid 607-867) in frame with His (N-terminal) and EGFP (C-terminal) tags in pCS2-FA vector. |
| 8   |                                     | R    | ATGCACCGGTGGATCCCAATGGACATCCTCT GTTGAGA                              |                                                                                                                                          |
| 9   | pCS2-p27                            | F    | ATATGGCCGGCCACCATGTCAAACG                                            | For cloning ORF of p27 into pCS2-FA vector.                                                                                              |
| 10  |                                     | R    | GCATGGCGCGCCTTACGTTTGACGTCT                                          |                                                                                                                                          |
| 11  | pcDNA-E2F1                          | F    | ATATGGTACCATGGCCTTGCCGGGGCCCC                                        | For cloning ORF of E2F1 into pcDNA3.1(+) vector.                                                                                         |
| 12  |                                     | R    | GCGCGAATTCTCAGAAATCCAGGGGGTGA                                        |                                                                                                                                          |
| 13  | pCS2-FA-His-E2F8-HA                 | F    | GCATGGCCGGCCACCATGGAGAACGAAAA GGAAA                                  | For tagging E2F8 with C-terminal HA and cloning this PCR product into a pCS2-FA-His vector.                                              |
| 14  |                                     | R    | ATGCGGCGCGCCTTAAGCGTAATCTGGAACA TCGTATGGGTACATATGGACATCCTCTGTTGA GAC |                                                                                                                                          |
| 15  | pCS2-FA-E2F8 pCS2-His-E2F8-N80-EGFP | F    | AGCCACATAAAAAGGGGACTAATGAAAGCACC TCTGAAAGAA                          | E2F8 mutagenesis: for substituting Thr 20 with Ala. Phosphorylation site mutation.                                                       |
| 16  |                                     | R    | TTCTTTCAGAGGTGCTTTCATTAGTCCCCTTTT ATGTGGCT                           |                                                                                                                                          |
| 17  | pCS2-FA-E2F8 pCS2-His-E2F8-N80-EGFP | F    | CTTTGGCCCTTTAACCGCACCTACCAAGCCCA A                                   | E2F8 mutagenesis: for substituting Thr 44 with Ala. Phosphorylation site mutation.                                                       |
| 18  |                                     | R    | TTGGGCTTGGTAGGTGCGGTTAAAGGGCCAA AG                                   |                                                                                                                                          |
| 19  | pCS2-FA-E2F8 pCS2-His-E2F8-N80-EGFP | F    | TGTGAGCCACATAAAAAGGGGACTAATGAAAGATC CTCTGAAAGAATCCACC                | E2F8 mutagenesis: for substituting Thr 20 with Asp. Phosphorylation site mutation.                                                       |
| 20  |                                     | R    | GGTGGATTCTTTCAGAGGATCTTTCATTAGTCCCCT TTTATGTGGCTCACA                 |                                                                                                                                          |
| 21  | pCS2-FA-E2F8 pCS2-His-E2F8-N80-EGFP | F    | CTGACTTTGGCCCTTTAACCGATCCTACCAAGCCCA AGGAAGG                         | E2F8 mutagenesis: for substituting Thr 44 with Asp. Phosphorylation site mutation.                                                       |
| 22  |                                     | R    | CCTTCCTTGGGCTTGGTAGGATCGGTTAAAGGGCC AAAGTCAG                         |                                                                                                                                          |
| 23  | pCS2-FA-E2F8 pCS2-FA-His-E2F8-HA    | F    | GAAAAGGAAAATCTCTTTGTGAGCCACATAAAGC GGGACTAATGAAAACAC                 | E2F8 mutagenesis: for substituting Arg 15 with Ala. RxL site mutation.                                                                   |
| 24  |                                     | R    | GTGTTTTTCATTAGTCCCCTTTATGTGGCTCACAAA AGAGATTTTCCTTTTC                |                                                                                                                                          |
| 25  | pCS2-FA-E2F8 pCS2-FA-His-E2F8-HA    | F    | GAGATCCGCAACAGAGATCAGAAAGCGGGTTTGT TTGACAA                           | E2F8 mutagenesis: for substituting Arg 81 with Ala. RxL site mutation.                                                                   |
| 26  |                                     | R    | TTGTCAAACAAACCCGCTTCTGATCTCTGTGCGG ATCTC                             |                                                                                                                                          |
| 27  | pCS2-FA-E2F8 pCS2-FA-His-E2F8-HA    | F    | TGGAAGATTTGGATAAAGCAAGTTTAAACAAAA ATTGCGAGGTTGTATGATATAGCTA          | E2F8 mutagenesis: for substituting Arg 313 with Ala. RxL site mutation.                                                                  |
| 28  |                                     | R    | TAGCTATATCATACAACCTCGCAATTTTGTTTTAA ACTTGCTTTTATCCAAATCTTCCA         |                                                                                                                                          |
| 29  | pCS2-FA-E2F8 pCS2-FA-His-E2F8-HA    | F    | AACTCTCTTTGTCCACAGGCAAACTGGAAGTCT CAACA                              | E2F8 mutagenesis: for substituting Arg 857 with Ala. RxL site mutation.                                                                  |
| 30  |                                     | R    | TGTTGAGACTCCAGTTTTGCCTGTGGGACAAAGA GAGTT                             |                                                                                                                                          |

1240

|    |                            |   |                                                                             |                                                                                                    |
|----|----------------------------|---|-----------------------------------------------------------------------------|----------------------------------------------------------------------------------------------------|
| 31 | pCS2-FA-E2F8               | F | GGCCACCATGGAGAACGAAGCGCAAATCTCTTT<br>TGTGAGCCAC                             | E2F8 mutagenesis: for substituting<br>Lys 5 and Glu 5 with Ala. KEN site<br>mutation.              |
| 32 | pCS2-His-E2F8-N80-<br>EGFP | R | GTGGCTCACAAAAGAGATTTGCCGCTTCGTTCTCCA<br>TGGTGGGCC                           |                                                                                                    |
| 33 | pCS2-FA-E2F8               | F | GGAGGTGAGACGGTCTTCAGCAGCGAACTGTGCCA<br>AAAACCTC                             | E2F8 mutagenesis: for substituting<br>Lys 375 and Glu 376 with Ala. KEN<br>site mutation.          |
| 34 |                            | R | GAGGTTTTTGGCACAGTTCGCTGCTGAAGACCGTCT<br>CACCTCC                             |                                                                                                    |
| 35 | pCS2-FA-E2F8               | F | GCAGAGTCCATTTTGTCTGGTGCAGCAAACCTCAAGT<br>GCT CTTTCCCC                       | E2F8 mutagenesis: for substituting<br>Lys 657 and Glu 658 with Ala. KEN<br>site mutation.          |
| 36 | pCS2-His-E2F8-C-<br>EGFP   | R | GGGAAAGAGCACCTTGAGTTTGTGTCACACAGACAA<br>AATGGAC TCTGC                       |                                                                                                    |
| 37 | pCS2-FA-E2F8               | F | GGGTTTGTGGACAACGGAGTGGAGTACCTGAGG<br>CCA AAGA                               | E2F8 mutagenesis: for substituting<br>Arg 87 and Leu 90 with Gly and Val.<br>RXXL site mutation.   |
| 38 |                            | R | TCTTTGGCCTCAGGTACTCCACTTCGTTGTCAAACA<br>AACCC                               |                                                                                                    |
| 39 | pCS2-FA-E2F8               | F | TACTTGGCACGGGGGACACAATGTCAACAAAAC<br>CCT TG                                 | E2F8 mutagenesis: for substituting<br>Arg 183 and Leu 186 with Gly and<br>Val. RXXL site mutation. |
| 40 |                            | R | CAAGGTTTTTGTGACATTGTGTCCTCCCGTCCAAG<br>TGTA                                 |                                                                                                    |
| 41 | pCS2-FA-E2F8               | F | GACGCATTTACGATATCGTGGAGAGTTTACATATGG<br>TGAG                                | E2F8 mutagenesis: Deletion of NVL<br>162. Dimerization domain mutation.                            |
| 42 |                            | R | CTCACCATATGTAACCTCTCCACGATATCGTAAATG<br>CGTC                                |                                                                                                    |
| 43 | pCS2-FA-E2F8               | F | AACAAAATTAGGAGGTTGTATGATATAGCTAGTA<br>GCCT GGATCTTAT                        | E2F8 mutagenesis: Deletion of NVL<br>320. Dimerization domain mutation.                            |
| 44 |                            | R | ATAAGATCCAGGCTACTAGCTATATCATACAACCTC<br>CTAATTT TTGTT                       |                                                                                                    |
| 45 | pCS2-FA-E2F8               | F | CAGAGAACTTAATGTTGAACGTGCAGCCATTTAC<br>GAT ATCGTGAACGTCC                     | E2F8 mutagenesis: for substituting<br>Arg 155 and 156 with Ala. DNA-<br>binding domain mutation.   |
| 46 |                            | R | GGACGTTACGATATCGTAAATGGCTGCACGTTCAA<br>CATTAA GTTCCTCTG                     |                                                                                                    |
| 47 | pCS2-FA-E2F8               | F | CCATGTGGAAGATTTGGATAAAAGCAAGTTTAAAA<br>CAAAAATTGCGGGCTTGATGA TATAGCTAATGTTC | E2F8 mutagenesis: for substituting<br>Arg 313 and 314 with Ala. DNA-<br>binding domain mutation.   |
| 48 |                            | R | GAACATTAGCTATATCATACAACGCCGCAATTTTTG<br>TTTTAAA CTTCCTTTATCCAATCTTCC ACATGG |                                                                                                    |

1241

\* Primer orientation; forward (F) or Reverse complement (R)
